# Supplementary material for: Quantitative profiling of glycerophospholipids during mouse and human macrophage differentiation using targeted mass spectrometry
Source: PubMed Central journal article supplement (PMC5428309; doi:10.1038/s41598-017-00341-2), 2017-03-24
Supplement: 41598_2017_341_MOESM1_ESM.pdf [file 41598_2017_341_MOESM1_ESM.pdf]

## **Supplementary Information**

### **Quantitative profiling of glycerophospholipids during mouse and human macrophage differentiation using targeted mass spectrometry**

Cuiping Zhang<sup>1\*</sup>, Yi Wang<sup>2\*</sup>, Fang Wang<sup>2</sup>, Zhenxin Wang<sup>2</sup>, Yu Lu<sup>1</sup>, Ying Xu<sup>2</sup>, Ke Wang<sup>2</sup>, Huali Shen<sup>2</sup>, Pengyuan Yang<sup>2</sup>, Shan Li<sup>1‡</sup>, Xue Qin<sup>1‡</sup>, Hongxiu Yu<sup>2‡</sup>

<sup>1</sup>Department of Clinical Laboratory, First Affiliated Hospital of Guangxi Medical University, Nanning 530021, Guangxi, China.

<sup>2</sup> Department of Systems Biology for Medicine and Institutes of Biomedical Sciences, Shanghai Medical College, Fudan University, Shanghai 200032, China.

\*These authors contributed equally to this work.

‡Corresponding authors: Shan Li (lis8858@126.com), Xue Qin (qinxue919@126.com) Hongxiu Yu (hongxiuyu@fudan.edu.cn)

**Table S1. Identification of lipid species by target-MS based on MRM method**

| <b>Class</b>       | <b>Subclass</b> | <b>Lipids</b>                               | <b>Transitions<br/>(<i>m/z</i>)</b> | <b>RT<sup>#</sup><br/>(min)</b> | <b>CE<sup>*</sup><br/>(ev)</b> | <b>Stability<br/>RSD%</b> | <b>Ion<br/>mode</b> |
|--------------------|-----------------|---------------------------------------------|-------------------------------------|---------------------------------|--------------------------------|---------------------------|---------------------|
| <b>GL</b>          | <b>PC</b>       | PC30:0(14:0/16:0)                           | 706.5 / 184.1                       | 43.63                           | 25                             | 2.90                      | positive            |
|                    |                 | PC30:1(14:0/16:1)                           | 704.5 / 184.1                       | 46.2                            | 25                             | 3.30                      | positive            |
|                    |                 | PC31:0(16:0e/16:0)                          | 720.5 / 184.1                       | 41.81                           | 25                             | 2.39                      | positive            |
|                    |                 | PC31:1p(16:0p/16:0)                         | 718.5 / 184.1                       | 41.92                           | 25                             | 0.04                      | positive            |
|                    |                 | PC32:0(16:0/16:0)                           | 734.6 / 184.1                       | 42.77                           | 25                             | 1.44                      | positive            |
|                    |                 | PC32:1(14:0/18:1)or(16:0/16:1)              | 732.5 / 184.1                       | 42.88                           | 25                             | 1.33                      | positive            |
|                    |                 | PC32:2(14:0/18:2)or(16:1/16:1)              | 730.5 / 184.1                       | 43.1                            | 25                             | 1.10                      | positive            |
|                    |                 | PC 33:0e(18:0e/16:0)                        | 748.6 / 184.1                       | 41.06                           | 25                             | 1.06                      | positive            |
|                    |                 | PC33:1e(18:0e/16:1)or(18:1e/16:0)           | 746.6 / 184.1                       | 41.17                           | 25                             | 1.07                      | positive            |
|                    |                 | PC 33:2e(16:1e/18:1)                        | 744.6 / 184.1                       | 41.38                           | 25                             | 1.31                      | positive            |
|                    |                 | PC 34:0(16:0/18:0)                          | 762.6 / 184.1                       | 42.13                           | 25                             | 0.57                      | positive            |
|                    |                 | PC 34:1(16:0/18:1)                          | 760.6 / 184.1                       | 42.24                           | 25                             | 0.58                      | positive            |
|                    |                 | PC34:2 (16:0/18:2)or(16:1/18:1)             | 758.6 / 184.1                       | 42.56                           | 25                             | 0.12                      | positive            |
|                    |                 | PC34:3(16:0/18:3)or(16:1/18:2)              | 756.6 / 184.1                       | 42.67                           | 25                             | 4.10                      | positive            |
|                    |                 | PC34:4(14:0/20:4)or(16:1/18:3)              | 754.5 / 184.1                       | 42.88                           | 25                             | 2.06                      | positive            |
|                    |                 | PC 34:5(14:0/20:5)                          | 752.5 / 184.1                       | 43.31                           | 25                             | 11.10                     | positive            |
|                    |                 | PC35:1(16:0/19:1)or(17:0/18:1)or(17:1/18:0) | 774.6 / 184.1                       | 40.42                           | 25                             | 2.52                      | positive            |
|                    |                 | PC 35:2e(16:0e/20:2)                        | 772.6 / 184.1                       | 40.74                           | 25                             | 1.92                      | positive            |
|                    |                 | PC 35:3(17:1/18:2)                          | 770.6 / 184.1                       | 40.52                           | 25                             | 3.89                      | positive            |
|                    |                 | PC 35:4(15:0/20:4)                          | 768.6 / 184.1                       | 40.95                           | 25                             | 0.80                      | positive            |
|                    |                 | PC 35:5(15:0/20:5)                          | 766.5 / 184.1                       | 41.27                           | 25                             | 0.49                      | positive            |
|                    |                 | PC 36:0p(16:0p/20:0)                        | 790.6 / 184.1                       | 41.38                           | 25                             | 0.08                      | positive            |
|                    |                 | PC 36:1(18:0/18:1)                          | 788.6 / 184.1                       | 41.49                           | 25                             | 3.97                      | positive            |
|                    |                 | PC 36:2(18:0/18:2)or(18:1/18:1)             | 786.6 / 184.1                       | 41.7                            | 25                             | 2.18                      | positive            |
|                    |                 | PC36:3(16:0/20:3)or(18:0/18:3)or(18:1/18:2) | 784.6 / 184.1                       | 42.02                           | 25                             | 2.98                      | positive            |
|                    |                 | PC36:4(16:0/20:4)                           | 782.6 / 184.1                       | 42.02                           | 25                             | 1.28                      | positive            |
| PC36:5 (16:1/20:4) | 780.6 / 184.1   | 42.45                                       | 25                                  | 0.54                            | positive                       |                           |                     |

|           |                    |                                    |               |       |      |          |          |
|-----------|--------------------|------------------------------------|---------------|-------|------|----------|----------|
| <b>GL</b> | <b>PC</b>          | PC 36:6(14:0/22:6)                 | 778.5 / 184.1 | 42.77 | 25   | 7.48     | positive |
|           |                    | PC 37:1(18:0/19:1)or(19:0/18:1)    | 802.6 / 184.1 | 39.67 | 25   | 0.47     | positive |
|           |                    | PC 37:2(18:1/19:1)or(18:2/19:0)    | 800.6 / 184.1 | 44.17 | 25   | 3.90     | positive |
|           |                    | PC 37:3(17:0/20:3)or(19:1/18:2)    | 798.6 / 184.1 | 40.1  | 25   | 0.26     | positive |
|           |                    | PC 37:4(17:0/20:4)                 | 796.6 / 184.1 | 40.1  | 25   | 1.52     | positive |
|           |                    | PC 37:5e(16:0e/22:5)or(18:0e/20:5) | 794.6 / 184.1 | 40.52 | 25   | 1.47     | positive |
|           |                    | PC 37:6(15:0/22:6)                 | 792.6 / 184.1 | 40.95 | 25   | 1.24     | positive |
|           |                    | PC 38:1(18:1/20:0)                 | 816.6 / 184.1 | 43.42 | 25   | 0.87     | positive |
|           |                    | PC 38:2(16:0/22:2)                 | 814.6 / 184.1 | 43.85 | 25   | 0.35     | positive |
|           |                    | PC 38:3(18:0/20:3)or(18:1/20:2)    | 812.6 / 184.1 | 41.27 | 25   | 1.95     | positive |
|           |                    | PC 38:4(18:0/20:4)                 | 810.6 / 184.1 | 41.17 | 25   | 1.09     | positive |
|           |                    | PC 38:5(18:0/20:5)                 | 808.6 / 184.1 | 41.49 | 25   | 4.38     | positive |
|           |                    | PC 38:6(18:2/20:4)                 | 806.6 / 184.1 | 42.02 | 25   | 2.44     | positive |
|           |                    | PC 38:7(16:1/22:6) or (18:2/20:5)  | 804.6 / 184.1 | 39.67 | 25   | 1.94     | positive |
|           |                    | PC 39:3(19:0/20:3)                 | 826.6 / 184.1 | 39.45 | 25   | 2.34     | positive |
|           |                    | PC 39:6(17:0/22:6)                 | 820.6 / 184.1 | 40.31 | 25   | 4.29     | positive |
|           |                    | PC 39:7(17:1/22:6)                 | 818.6 / 184.1 | 40.52 | 25   | 0.71     | positive |
|           |                    | PC 40:1(18:1/22:0)                 | 844.7 / 184.1 | 40.1  | 25   | 1.90     | positive |
|           |                    | PC 40:4(18:0/22:4) or( 20:1/20:3)  | 838.6 / 184.1 | 40.74 | 25   | 2.92     | positive |
|           |                    | PC 40:5(18:0/22:5)                 | 836.6 / 184.1 | 41.06 | 25   | 2.50     | positive |
|           |                    | PC 40:6(18:0/22:6)                 | 834.6 / 184.1 | 41.27 | 25   | 2.24     | positive |
|           |                    | PC 40:7(18:1/22:6)                 | 832.6 / 184.1 | 41.49 | 25   | 2.54     | positive |
|           |                    | PC 40:8(20:4/20:4)                 | 830.6 / 184.1 | 39.13 | 25   | 5.80     | positive |
|           | PC 41:6(19:0/22:6) | 848.6 / 184.1                      | 39.56         | 25    | 5.01 | positive |          |
|           | <b>PE</b>          | PE 32:0(16:0/16:0)                 | 692.5 / 551.5 | 19.52 | 25   | 1.43     | positive |
|           |                    | PE 32:1(14:0/18:1)or(16:0/16:1)    | 690.5 / 549.5 | 19.52 | 25   | 0.28     | positive |
|           |                    | PE 32:2(14:0/18:2)                 | 688.5 / 547.5 | 19.62 | 25   | 0.00     | positive |
|           |                    | PE 33:1(15:0/18:1)                 | 704.6 / 563.6 | 17.48 | 25   | 8.28     | positive |
|           |                    | PE 33:2(15:0/18:2)                 | 702.5 / 561.5 | 17.44 | 25   | 0.11     | positive |
|           |                    | PE 34:0(16:0/18:0)                 | 720.6 / 579.6 | 18.98 | 25   | 0.95     | positive |
|           |                    | PE 34:1(16:0/18:1)                 | 718.5 / 577.5 | 18.98 | 25   | 0.22     | positive |
|           |                    | PE 34:2(16:0/18:2)or(16:1/18:1)    | 716.5 / 575.5 | 18.98 | 25   | 0.56     | positive |
|           |                    | PE 34:3(16:0/18:3)                 | 714.5 / 573.5 | 19.3  | 25   | 1.83     | positive |

|           |           |                                                 |               |       |    |      |          |
|-----------|-----------|-------------------------------------------------|---------------|-------|----|------|----------|
| <b>GL</b> | <b>PE</b> | PE 35:1(17:0/18:1)                              | 732.6 / 591.6 | 16.84 | 25 | 3.10 | positive |
|           |           | PE 35:2(17:0/18:2)                              | 730.5 / 589.5 | 16.96 | 25 | 1.94 | positive |
|           |           | PE 35:3(17:1/18:2)                              | 728.5 / 587.5 | 16.73 | 25 | 0.09 | positive |
|           |           | PE 35:4p(16:0p/20:3)or(16:0e/20:4)              | 726.5 / 585.5 | 17.05 | 25 | 0.07 | positive |
|           |           | PE 35:5p(16:0p/20:4)                            | 724.5 / 583.5 | 17.37 | 25 | 0.84 | positive |
|           |           | PE 35:6p(16:0p/20:5)                            | 722.5 / 581.5 | 18.87 | 25 | 1.83 | positive |
|           |           | PE 36:1(16:0/20:1)or(18:0/18:1)                 | 746.6 / 605.6 | 18.34 | 25 | 3.49 | positive |
|           |           | PE 36:2(18:0/18:2)or(18:1/18:1)                 | 744.6 / 603.6 | 18.45 | 25 | 4.51 | positive |
|           |           | PE 36:3(18:1/18:2)                              | 742.5 / 601.5 | 18.77 | 25 | 7.72 | positive |
|           |           | PE 36:4(16:0/20:4)                              | 740.5 / 599.5 | 18.55 | 25 | 3.94 | positive |
|           |           | PE 36:5(16:0/20:5)                              | 738.5 / 597.5 | 18.77 | 25 | 5.43 | positive |
|           |           | PE 36:6(16:1/20:5)                              | 736.5 / 595.5 | 19.2  | 25 | 4.03 | positive |
|           |           | PE 37:2(19:0/18:2)                              | 758.6 / 617.6 | 16.2  | 25 | 5.77 | positive |
|           |           | PE 37:3(17:0/20:3)                              | 756.6 / 615.6 | 16.52 | 25 | 3.06 | positive |
|           |           | PE 37:4(17:0/20:4)                              | 754.5 / 613.5 | 16.41 | 25 | 2.90 | positive |
|           |           | PE 37:5p(16:0p/22:4) or(18:1p/20:3)             | 752.5 / 611.5 | 17.05 | 25 | 0.71 | positive |
|           |           | PE37:6p(18:0p/20:5)or(18:1p/20:4)or(16:0e/22:6) | 750.5 / 609.5 | 16.95 | 25 | 1.09 | positive |
|           |           | PE 37:7p(16:0p/22:6)                            | 748.6 / 607.6 | 18.34 | 25 | 2.06 | positive |
|           |           | PE 38:1(18:0/20:1)                              | 774.6 / 633.6 | 17.59 | 25 | 5.78 | positive |
|           |           | PE 38:2(18:1/20:1)                              | 772.6 / 631.6 | 17.59 | 25 | 3.66 | positive |
|           |           | PE 38:3(18:0/20:3)                              | 770.6 / 629.6 | 17.48 | 25 | 1.96 | positive |
|           |           | PE 38:4(16:0/22:4)                              | 768.6 / 627.6 | 17.8  | 25 | 3.33 | positive |
|           |           | PE 38:5(18:0/20:5)                              | 766.5 / 625.5 | 18.02 | 25 | 3.05 | positive |
|           |           | PE 38:6(16:0/22:6)or(16:1/22:5)or(20:2/18:4)    | 764.5 / 623.5 | 18.66 | 25 | 3.34 | positive |
|           |           | PE 38:7(16:1/22:6)or(18:2/20:5)                 | 762.5 / 621.5 | 18.77 | 25 | 6.75 | positive |
|           |           | PE 40:1(22:0/18:1)                              | 802.6 / 661.6 | 17.05 | 25 | 1.69 | positive |
|           |           | PE 40:2(18:1/22:1)                              | 800.6 / 659.6 | 17.16 | 25 | 1.77 | positive |
|           |           | PE 40:3(18:1/22:2) or (22:1/18:2)               | 822.6 / 681.6 | 17.16 | 25 | 3.81 | positive |
|           |           | PE 40:4(20:0/20:4)                              | 818.6 / 677.6 | 17.37 | 25 | 0.05 | positive |
|           |           | PE 40:5(18:0/22:5)                              | 816.6 / 675.6 | 17.80 | 25 | 2.50 | positive |
|           |           | PE 40:6(18:0/22:6)                              | 792.6 / 651.6 | 17.91 | 25 | 4.50 | positive |
|           |           | PE 40:7(18:1/22:6)                              | 790.5 / 649.5 | 18.12 | 25 | 2.54 | positive |
|           |           | PE 42:5; PE 22:1/20:4                           | 822.6 / 681.6 | 17.16 | 25 | 8.28 | positive |

|    |    |                                                 |               |       |    |       |          |
|----|----|-------------------------------------------------|---------------|-------|----|-------|----------|
| GL |    | PE 42:7; PE 20:1/22:6                           | 818.6 / 677.6 | 17.37 | 25 | 8.11  | positive |
|    |    | PE 42:8; PE 20:2/22:6                           | 816.6 / 675.6 | 17.8  | 25 | 0.31  | positive |
|    | PG | PG30:0(14:0/16:0)                               | 695.5 / 523.5 | 12.23 | 25 | 3.30  | positive |
|    |    | PG30:1(14:0/16:1)                               | 693.5 / 521.5 | 12.23 | 25 | 3.85  | positive |
|    |    | PG31:0(16:0e/16:0)                              | 709.5 / 537.5 | 11.8  | 25 | 6.14  | positive |
|    |    | PG31:1(16:0p/16:0)                              | 707.5 / 535.5 | 12.12 | 25 | 13.32 | positive |
|    |    | PG32:0(16:0/16:0)                               | 723.5 / 551.5 | 12.02 | 25 | 2.18  | positive |
|    |    | PG32:1(14:0/18:1)or(16:0/16:1)                  | 721.5 / 549.5 | 12.02 | 25 | 1.96  | positive |
|    |    | PG32:2(14:0/18:2)                               | 719.5 / 547.5 | 12.12 | 25 | 42.71 | positive |
|    |    | PG33:0(18:0e/16:0)                              | 737.5 / 565.5 | 12.02 | 25 | 2.52  | positive |
|    |    | PG33:1(15:0/18:1)                               | 735.5 / 563.5 | 11.91 | 25 | 0.33  | positive |
|    |    | PG33:2(15:0/18:2)                               | 733.5 / 561.5 | 12.02 | 25 | 0.43  | positive |
|    |    | PG34:0(16:0/18:0)                               | 751.5 / 579.5 | 11.91 | 25 | 0.39  | positive |
|    |    | PG34:1(16:0/18:1)                               | 749.5 / 577.5 | 11.91 | 25 | 0.74  | positive |
|    |    | PG34:2(16:0/18:2)or(16:1/18:1)                  | 747.5 / 575.5 | 11.91 | 25 | 0.98  | positive |
|    |    | PG34:3(16:0/18:3)                               | 745.5 / 573.5 | 12.02 | 25 | 4.63  | positive |
|    |    | PG34:4(14:0/20:4)or(16:1/18:3)                  | 743.5 / 571.5 | 12.02 | 25 | 5.72  | positive |
|    |    | PG35:1(17:0/18:1)                               | 763.5 / 591.5 | 11.8  | 25 | 0.30  | positive |
|    |    | PG35:2(17:0/18:2)                               | 761.5 / 589.5 | 11.8  | 25 | 4.60  | positive |
|    |    | PG35:5(15:0/20:5)                               | 755.5 / 583.5 | 11.48 | 25 | 16.86 | positive |
|    |    | PG36:0 p(16:0p/20:0)                            | 779.5 / 607.5 | 11.69 | 25 | 10.43 | positive |
|    |    | PG36:1(16:0/20:1)or(18:0/18:1)                  | 777.5 / 605.5 | 11.69 | 25 | 7.30  | positive |
|    |    | PG36:2(18:0/18:2)or(18:1/18:1)                  | 775.5 / 603.5 | 11.8  | 25 | 6.13  | positive |
|    |    | PG36:3(18:1/18:2)                               | 773.5 / 601.5 | 11.8  | 25 | 2.44  | positive |
|    |    | PG36:4(16:0/20:4)                               | 771.5 / 599.5 | 11.8  | 25 | 0.07  | positive |
|    |    | PG36:5(16:0/20:5)                               | 769.5 / 597.5 | 11.91 | 25 | 6.15  | positive |
|    |    | PG36:6(16:1/20:5)                               | 767.5 / 595.5 | 6.12  | 25 | 10.88 | positive |
|    |    | PG37:3(17:0/20:3)                               | 787.5 / 615.5 | 6.12  | 25 | 0.50  | positive |
|    |    | PG37:4(17:0/20:4)                               | 785.5 / 613.5 | 11.48 | 25 | 0.69  | positive |
|    |    | PG37:5 e(16:0e/22:5)or(18:0e/20:5)              | 783.5 / 611.5 | 6.12  | 25 | 27.25 | positive |
|    |    | PG37:6p(18:0p/20:5)or(18:1p/20:4)or(16:0e/22:6) | 781.5 / 609.5 | 11.8  | 25 | 10.44 | positive |
|    |    | PG38:1(18:0/20:1)                               | 805.5 / 633.5 | 11.59 | 25 | 4.99  | positive |
|    |    | PG38:2(18:1/20:1)                               | 803.5 / 631.5 | 11.59 | 25 | 0.02  | positive |

|           |           |                                             |               |       |    |       |          |
|-----------|-----------|---------------------------------------------|---------------|-------|----|-------|----------|
| <b>GL</b> | <b>PG</b> | PG38:3(18:0/20:3)                           | 801.5 / 629.5 | 11.59 | 25 | 1.74  | positive |
|           |           | PG38:4(16:0/22:4)                           | 799.5 / 627.5 | 11.69 | 25 | 3.86  | positive |
|           |           | PG38:5(18:0/20:5)                           | 797.5 / 625.5 | 11.69 | 25 | 9.29  | positive |
|           |           | PG38:6(16:0/22:6)or(16:1/22:5)or(20:2/18:4) | 795.5 / 623.5 | 11.8  | 25 | 6.63  | positive |
|           |           | PG39:3(19:0/20:3)                           | 815.5 / 643.5 | 6.55  | 25 | 2.96  | positive |
|           |           | PG39:6(17:0/22:6)                           | 809.5 / 637.5 | 12.55 | 25 | 2.30  | positive |
|           |           | PG39:7(17:1/22:6)                           | 807.5 / 635.5 | 11.59 | 25 | 12.80 | positive |
|           |           | PG40:1(18:1/22:0)                           | 833.5 / 661.5 | 11.37 | 25 | 0.39  | positive |
|           |           | PG40:4(18:0/22:4) or (20:0/20:4)            | 827.5 / 655.5 | 11.59 | 25 | 0.29  | positive |
|           |           | PG40:5(18:0/22:5)                           | 825.5 / 653.5 | 11.69 | 25 | 11.00 | positive |
|           |           | PG40:6(18:0/22:6)                           | 823.5 / 651.5 | 11.59 | 25 | 3.67  | positive |
|           |           | PG40:7(18:1/22:6)                           | 821.5 / 649.5 | 9.34  | 25 | 2.26  | positive |
|           |           | PG40:8(20:4/20:4)                           | 819.5 / 647.5 | 11.69 | 25 | 3.22  | positive |
|           |           | PG41:6(19:0/22:6)                           | 837.5 / 665.5 | 6.55  | 25 | 1.27  | positive |
|           | <b>PS</b> | PS30:0(14:0/16:0)                           | 708.5 / 523.5 | 26.38 | 25 | 4.52  | positive |
|           |           | PS30:1(14:0/16:1)                           | 706.5 / 521.5 | 26.59 | 25 | 0.37  | positive |
|           |           | PS31:0(16:0e/16:0)                          | 722.5 / 537.5 | 26.06 | 25 | 2.24  | positive |
|           |           | PS31:1(16:0p/16:0)                          | 720.5 / 535.5 | 24.34 | 25 | 8.40  | positive |
|           |           | PS32:0(16:0/16:0)                           | 736.5 / 551.5 | 25.73 | 25 | 5.02  | positive |
|           |           | PS32:1(14:0/18:1)or(16:0/16:1)              | 734.5 / 549.5 | 25.73 | 25 | 2.21  | positive |
|           |           | PS32:2(14:0/18:2)                           | 732.5 / 547.5 | 25.95 | 25 | 4.98  | positive |
|           |           | PS33:0(18:0e/16:0)                          | 750.5 / 565.5 | 25.52 | 25 | 3.45  | positive |
|           |           | PS33:1(15:0/18:1)                           | 748.5 / 563.5 | 23.91 | 25 | 0.21  | positive |
|           |           | PS33:2(15:0/18:2)                           | 746.5 / 561.5 | 24.02 | 25 | 9.37  | positive |
|           |           | PS34:0(15:0/18:2)                           | 764.5 / 579.5 | 25.2  | 25 | 6.77  | positive |
|           |           | PS34:1(16:0/18:1)                           | 762.5 / 577.5 | 25.2  | 25 | 2.41  | positive |
|           |           | PS34:2(16:0/18:2)or(16:1/18:1)              | 760.5 / 575.5 | 25.31 | 25 | 3.74  | positive |
|           |           | PS34:3(16:0/18:3)                           | 758.5 / 573.5 | 25.52 | 25 | 3.39  | positive |
|           |           | PS34:4(14:0/20:4)or(16:1/18:3)              | 756.5 / 571.5 | 25.41 | 25 | 5.44  | positive |
|           |           | PS35:1(17:0/18:1)                           | 776.5 / 591.5 | 24.88 | 25 | 3.22  | positive |
|           |           | PS35:2(17:0/18:2)                           | 774.5 / 589.5 | 23.53 | 25 | 4.77  | positive |
|           |           | PS35:3(17:1/18:2)                           | 772.5 / 587.5 | 23.91 | 25 | 4.57  | positive |
|           |           | PS35:4(15:0/20:4)                           | 770.5 / 585.5 | 23.7  | 25 | 6.22  | positive |

|    |                    |                                   |               |       |      |          |          |
|----|--------------------|-----------------------------------|---------------|-------|------|----------|----------|
| GL | PS                 | PS35:5(15:0/20:5)                 | 768.5 / 583.5 | 31.74 | 25   | 14.86    | positive |
|    |                    | PS36:0 p(16:0p/20:0)              | 792.5 / 607.5 | 24.45 | 25   | 2.06     | positive |
|    |                    | PS36:1(16:0/20:1)or(18:0/18:1)    | 790.5 / 605.5 | 24.45 | 25   | 1.18     | positive |
|    |                    | PS36:2(18:0/18:2)or(18:1/18:1)    | 788.5 / 603.5 | 24.88 | 25   | 0.65     | positive |
|    |                    | PS36:3(18:1/18:2)                 | 786.5 / 601.5 | 24.88 | 25   | 2.16     | positive |
|    |                    | PS36:4(16:0/20:4)                 | 784.5 / 599.5 | 24.88 | 25   | 4.59     | positive |
|    |                    | PS36:5(16:0/20:5)                 | 782.5 / 597.5 | 25.2  | 25   | 3.13     | positive |
|    |                    | PS36:6(16:1/20:5)                 | 780.5 / 595.5 | 24.98 | 25   | 2.94     | positive |
|    |                    | PS37:1(18:0/19:1)or(19:0/18:1)    | 804.5 / 619.5 | 24.23 | 25   | 2.12     | positive |
|    |                    | PS37:2(18:1/19:1)or(18:2/19:0)    | 802.5 / 617.5 | 24.34 | 25   | 3.17     | positive |
|    |                    | PS37:3(17:0/20:3)or(19:1/18:2)    | 800.5 / 615.5 | 23.14 | 25   | 4.75     | positive |
|    |                    | PS37:4(17:0/20:4)                 | 798.5 / 613.5 | 23.38 | 25   | 0.48     | positive |
|    |                    | PS37:5e(16:0e/22:5)or(18:0e/20:5) | 796.5 / 611.5 | 23.59 | 25   | 11.98    | positive |
|    |                    | PS37:6(15:0/22:6)                 | 794.5 / 609.5 | 24.55 | 25   | 8.69     | positive |
|    |                    | PS38:1(18:1/20:0)                 | 818.5 / 633.5 | 24.02 | 25   | 7.62     | positive |
|    |                    | PS38:2(16:0/22:2)                 | 816.5 / 631.5 | 24.02 | 25   | 6.94     | positive |
|    |                    | PS38:3(18:0/20:3)                 | 814.5 / 629.5 | 24.23 | 25   | 0.05     | positive |
|    |                    | PS38:4(18:0/20:4)                 | 812.5 / 627.5 | 24.13 | 25   | 1.64     | positive |
|    |                    | PS38:5(18:0/20:5)                 | 810.5 / 625.5 | 24.34 | 25   | 1.52     | positive |
|    |                    | PS38:6 (18:2/20:4)                | 808.5 / 623.5 | 24.88 | 25   | 0.62     | positive |
|    |                    | PS38:7(16:1/22:6) or (18:2/20:5)  | 806.5 / 621.5 | 24.23 | 25   | 6.08     | positive |
|    |                    | PS39:3(19:0/20:3)                 | 828.5 / 643.5 | 23.91 | 25   | 8.80     | positive |
|    |                    | PS39:6(17:0/22:6)                 | 822.5 / 637.5 | 24.45 | 25   | 2.57     | positive |
|    |                    | PS39:7(17:1/22:6)                 | 820.5 / 635.5 | 24.02 | 25   | 2.58     | positive |
|    |                    | PS40:1(18:1/22:0)                 | 776.5 / 591.5 | 24.88 | 25   | 3.75     | positive |
|    |                    | PS40:4(18:0/22:4) or( 20:1/20:3)  | 774.5 / 589.5 | 23.53 | 25   | 0.76     | positive |
|    |                    | PS40:5(18:0/22:5)                 | 772.5 / 587.5 | 23.91 | 25   | 1.59     | positive |
|    |                    | PS40:6(18:0/22:6)                 | 770.5 / 585.5 | 23.7  | 25   | 1.73     | positive |
|    |                    | PS40:7(18:1/22:6)                 | 768.5 / 583.5 | 31.74 | 25   | 1.85     | positive |
|    |                    | PS40:8(20:4/20:4)                 | 792.5 / 607.5 | 24.45 | 25   | 8.95     | positive |
|    | PS41:6(19:0/22:6)  | 790.5 / 605.5                     | 24.45         | 25    | 5.60 | positive |          |
|    | lysoPC 14:0 (sn-2) | 468.3 / 184.1                     | 54.5          | 25    | 0.86 | positive |          |
|    | lysoPC 15:0 (sn-2) | 482.3 / 184.1                     | 52.96         | 25    | 2.84 | positive |          |

|           |                    |                    |                    |               |       |       |          |
|-----------|--------------------|--------------------|--------------------|---------------|-------|-------|----------|
| <b>GL</b> | <b>lysoPC</b>      | lysoPC 15:1 (sn-1) | 480.3 / 184.1      | 53.6          | 25    | 7.68  | positive |
|           |                    | lysoPC 16:0 (sn-2) | 496.3 / 184.1      | 51.88         | 25    | 4.54  | positive |
|           |                    | lysoPC 16:1 (sn-1) | 494.3 / 184.1      | 52.85         | 25    | 5.31  | positive |
|           |                    | lysoPC 17:0 (sn-1) | 510.4 / 184.1      | 51.35         | 25    | 6.32  | positive |
|           |                    | lysoPC 17:1 (sn-1) | 508.3 / 184.1      | 51.99         | 25    | 4.52  | positive |
|           |                    | lysoPC 18:0 (sn-1) | 524.4 / 184.1      | 51.03         | 25    | 9.37  | positive |
|           |                    | lysoPC 18:1 (sn-1) | 522.4 / 184.1      | 51.03         | 25    | 5.94  | positive |
|           |                    | lysoPC 18:2 (sn-1) | 520.3 / 184.1      | 52.1          | 25    | 7.20  | positive |
|           |                    | lysoPC 18:3 (sn-1) | 518.3 / 184.1      | 52.85         | 25    | 7.56  | positive |
|           |                    | lysoPC 19:0 (sn-1) | 538.4 / 184.1      | 50.17         | 25    | 6.52  | positive |
|           |                    | lysoPC 20:0 (sn-1) | 552.4 / 184.1      | 49.85         | 25    | 0.88  | positive |
|           |                    | lysoPC 20:1 (sn-1) | 550.4 / 184.1      | 49.85         | 25    | 4.73  | positive |
|           |                    | lysoPC 20:2 (sn-1) | 548.4 / 184.1      | 50.38         | 25    | 1.86  | positive |
|           |                    | lysoPC 20:3 (sn-1) | 546.4 / 184.1      | 50.49         | 25    | 0.56  | positive |
|           |                    | lysoPC 20:4 (sn-1) | 544.3 / 184.1      | 51.46         | 25    | 0.95  | positive |
|           |                    | lysoPC 20:5 (sn-1) | 542.3 / 184.1      | 52.42         | 25    | 1.54  | positive |
|           |                    | lysoPC 22:0 (sn-1) | 580.4 / 184.1      | 51.03         | 25    | 1.31  | positive |
|           |                    | lysoPC 22:4 (sn-1) | 572.4 / 184.1      | 50.28         | 25    | 6.09  | positive |
|           |                    | lysoPC 22:6 (sn-1) | 568.3 / 184.1      | 51.35         | 25    | 1.49  | positive |
|           |                    | <b>lysoPE</b>      | lysoPE 14:0 (sn-2) | 426.3 / 285.3 | 33.24 | 25    | 15.04    |
|           | lysoPE 16:0 (sn-1) |                    | 454.3 / 313.3      | 31.82         | 25    | 1.27  | positive |
|           | lysoPE 17:0 (sn-2) |                    | 468.3 / 327.3      | 31.5          | 25    | 8.00  | positive |
|           | lysoPE 18:0 (sn-1) |                    | 482.3 / 341.3      | 32.38         | 25    | 14.75 | positive |
|           | lysoPE 18:1 (sn-1) |                    | 480.3 / 339.3      | 31.2          | 25    | 2.06  | positive |
|           | lysoPE 18:2 (sn-2) |                    | 478.3 / 337.3      | 31.74         | 25    | 5.19  | positive |
|           | lysoPE 20:0 (sn-2) |                    | 510.4 / 369.4      | 29.7          | 25    | 4.89  | positive |
|           | lysoPE 20:1 (sn-2) |                    | 508.3 / 367.3      | 29.91         | 25    | 4.51  | positive |
|           | lysoPE 20:3 (sn-2) |                    | 504.3 / 363.3      | 30.34         | 25    | 6.90  | positive |
|           | lysoPE 20:4 (sn-2) |                    | 502.3 / 361.3      | 30.88         | 25    | 8.26  | positive |
|           | lysoPE 20:5 (sn-1) |                    | 500.3 / 359.3      | 31.63         | 25    | 10.15 | positive |
|           | lysoPE 22:6 (sn-1) |                    | 526.3 / 385.3      | 31.09         | 25    | 7.80  | positive |
|           |                    | Cer120             | 482.6 / 264.4      | 6.23          | 35    | 2.65  | positive |
|           |                    | Cer160             | 538.7 / 264.4      | 6.23          | 37.5  | 8.37  | positive |



|                                  |                    |                                      |               |       |      |       |          |
|----------------------------------|--------------------|--------------------------------------|---------------|-------|------|-------|----------|
| <b>Ceramide</b>                  | <b>Cer<br/>Cer</b> | Cer180                               | 566.7 / 264.4 | 6.23  | 37.5 | 9.86  | positive |
|                                  |                    | Cer241                               | 648.9 / 264.4 | 6.23  | 42.5 | 12.39 | positive |
|                                  |                    | Cer240                               | 650.9 / 264.4 | 6.23  | 42.5 | 6.02  | positive |
|                                  |                    | Cer250                               | 664.9 / 264.4 | 6.12  | 45   | 7.04  | positive |
| <b>Ceramide</b>                  | <b>C1P</b>         | C1P120                               | 562.6 / 264.4 | 6.23  | 45   | 11.60 | positive |
|                                  |                    | C1P160                               | 618.7 / 264.4 | 6.23  | 47.5 | 2.39  | positive |
|                                  |                    | C1P240                               | 730.9 / 264.4 | 7.62  | 52.5 | 8.19  | positive |
| <b>Sphingoid<br/>bases</b>       | <b>So</b>          | d171So                               | 286.4 / 268.3 | 13.52 | 21   | 15.51 | positive |
|                                  |                    | d181So                               | 300.4 / 282.4 | 13.19 | 21   | 4.63  | positive |
|                                  | <b>Sa</b>          | d170Sa                               | 288.4 / 60.0  | 9.01  | 50   | 27.67 | positive |
|                                  |                    | d180Sa                               | 302.4 / 60.0  | 14.48 | 50   | 6.44  | positive |
|                                  | <b>S1P</b>         | d171S1P                              | 366.4 / 250.3 | 9.55  | 25   | 12.80 | positive |
|                                  |                    | d18:1S1P                             | 380.4 / 264.4 | 49.31 | 25   | 14.05 | positive |
|                                  | <b>Sa1P</b>        | d170Sa1P                             | 368.4 / 252.2 | 6.23  | 25   | 50.48 | positive |
|                                  |                    | d18:0Sa1P                            | 382.4 / 266.4 | 57.89 | 25   | 11.91 | positive |
| <b>Phosphosp<br/>hingolipids</b> | <b>SM</b>          | SM120                                | 647.7 / 184.4 | 47.38 | 40   | 1.70  | positive |
|                                  |                    | SM180                                | 731.8 / 184.4 | 42.88 | 45   | 1.40  | positive |
|                                  |                    | SM240                                | 815.9 / 184.4 | 43.31 | 50   | 1.93  | positive |
| <b>GL</b>                        | <b>PI</b>          | PI 30:0(14:0/16:0)                   | 781.5 / 241.1 | 20.42 | -65  | 2.73  | negative |
|                                  |                    | PI 30:1(14:0/16:1)                   | 779.5 / 241.1 | 20.65 | -65  | 4.30  | negative |
|                                  |                    | PI 31:0(16:0e/16:0)                  | 795.5 / 241.1 | 21.09 | -65  | 5.34  | negative |
|                                  |                    | PI 31:1p(16:0p/16:0)                 | 793.5 / 241.1 | 19.7  | -65  | 5.97  | negative |
|                                  |                    | PI 32:0(16:0/16:0)                   | 809.5 / 241.1 | 20.58 | -65  | 8.88  | negative |
|                                  |                    | PI 32:1(14:0/18:1) or (16:0/16:1)    | 807.5 / 241.1 | 20.55 | -65  | 3.92  | negative |
|                                  |                    | PI 32:2(14:0/18:2) or (16:1/16:1)    | 805.5 / 241.1 | 20.71 | -65  | 12.41 | negative |
|                                  |                    | PI 33:0e(18:0e/16:0)                 | 823.5 / 241.1 | 20.12 | -65  | 0.49  | negative |
|                                  |                    | PI 33:1e(18:0e/16:1) or (18:1e/16:0) | 821.5 / 241.1 | 20.22 | -65  | 0.50  | negative |
|                                  |                    | PI 33:2e(16:1e/18:1)                 | 819.5 / 241.1 | 20.28 | -65  | 12.42 | negative |
|                                  |                    | PI 34:0(16:0/18:0)                   | 837.5 / 241.1 | 19.94 | -65  | 0.67  | negative |
|                                  |                    | PI 34:1(16:0/18:1)                   | 835.5 / 241.1 | 19.95 | -65  | 2.04  | negative |
|                                  |                    | PI 34:2(16:0/18:2) or (16:1/18:1)    | 833.5 / 241.1 | 20.12 | -65  | 2.86  | negative |
|                                  |                    | PI 34:3(16:0/18:3) or (16:1/18:2)    | 831.5 / 241.1 | 20.12 | -65  | 1.01  | negative |

|    |    |                                              |               |       |     |       |          |
|----|----|----------------------------------------------|---------------|-------|-----|-------|----------|
| GL | PI | PI 34:4(14:0/20:4)                           | 829.5 / 241.1 | 20.48 | -65 | 3.41  | negative |
|    |    | PI 34:5(14:0/20:5)                           | 827.5 / 241.1 | 19.47 | -65 | 0.76  | negative |
|    |    | PI35:1(16:0/19:1) or(17:0/18:1)or(17:1/18:0) | 849.5 / 241.1 | 19.52 | -65 | 6.85  | negative |
|    |    | PI 35:2e(16:0e/20:2)                         | 847.5 / 241.1 | 19.82 | -65 | 2.47  | negative |
|    |    | PI 35:3(17:1/18:2)                           | 845.5 / 241.1 | 18.39 | -65 | 5.20  | negative |
|    |    | PI 35:4(15:0/20:4)                           | 843.5 / 241.1 | 18.69 | -65 | 3.24  | negative |
|    |    | PI 35:5(15:0/20:5)                           | 841.5 / 241.1 | 19.28 | -65 | 8.17  | negative |
|    |    | PI 36:0p(16:0p/22:6)                         | 865.5 / 241.1 | 19.32 | -65 | 10.61 | negative |
|    |    | PI 36:1(18:0/18:1)                           | 863.5 / 241.1 | 19.39 | -65 | 10.18 | negative |
|    |    | PI 36:2(18:0/18:2) or (18:1/18:1)            | 861.5 / 241.1 | 19.5  | -65 | 8.46  | negative |
|    |    | PI 36:4(16:0/20:4)                           | 857.5 / 241.1 | 19.65 | -65 | 2.21  | negative |
|    |    | PI36:5(14:0/22:5)or(16:0/20:5)or (16:1/20:4) | 855.5 / 241.1 | 19.92 | -65 | 9.86  | negative |
|    |    | PI 36:6(14:0/22:6)                           | 853.5 / 241.1 | 19.75 | -65 | 5.68  | negative |
|    |    | PI 37:1(18:0/19:1) or (19:0/18:1)            | 877.5 / 241.1 | 19.06 | -65 | 7.16  | negative |
|    |    | PI 37:2(18:1/19:1) or (18:2/19:0)            | 875.5 / 241.1 | 19.00 | -65 | 6.37  | negative |
|    |    | PI 37:3(17:0/20:3) or (19:1/18:2)            | 873.5 / 241.1 | 19.03 | -65 | 0.54  | negative |
|    |    | PI 37:4(17:0/20:4)                           | 871.5 / 241.1 | 18.08 | -65 | 2.96  | negative |
|    |    | PI 37:5e( 16:0e/22:5) or (18:0e/20:5)        | 869.5 / 241.1 | 18.33 | -65 | 0.85  | negative |
|    |    | PI 37:6(15:0/22:6)                           | 867.5 / 241.1 | 18.65 | -65 | 12.62 | negative |
|    |    | PI 38:1(18:1/20:0)                           | 891.5 / 241.1 | 18.67 | -65 | 13.66 | negative |
|    |    | PI 38:2(16:0/22:2)                           | 889.5 / 241.1 | 18.66 | -65 | 5.99  | negative |
|    |    | PI 38:3(18:0/20:3) or (18:1/20:2)            | 887.5 / 241.1 | 18.66 | -65 | 3.97  | negative |
|    |    | PI 38:4(18:0/20:4)                           | 885.5 / 241.1 | 18.94 | -65 | 4.14  | negative |
|    |    | PI 38:5(18:0/20:5)                           | 883.5 / 241.1 | 19.21 | -65 | 3.66  | negative |
|    |    | PI 38:6(16:0/22:6 )or (18:2/20:4)            | 881.5 / 241.1 | 19.57 | -65 | 4.38  | negative |
|    |    | PI 38:7(16:1/22:6) or (18:2/20:5)            | 879.5 / 241.1 | 20.03 | -65 | 13.41 | negative |
|    |    | PI 39:3( 19:0/20:3)                          | 901.5 / 241.1 | 18.63 | -65 | 13.42 | negative |
|    |    | PI 39:6(17:0/22:6)                           | 895.5 / 241.1 | 18.24 | -65 | 9.86  | negative |
|    |    | PI 39:7(17:1/22:6)                           | 893.5 / 241.1 | 18.39 | -65 | 5.62  | negative |
|    |    | PI 40:1(18:1/22:0)                           | 919.5 / 241.1 | 18.18 | -65 | 12.63 | negative |
|    |    | PI 40:4(18:0/22:4 )or (20:1/20:3)            | 913.5 / 241.1 | 18.56 | -65 | 1.19  | negative |
|    |    | PI 40:5(18:0/22:5)                           | 911.5 / 241.1 | 18.85 | -65 | 1.04  | negative |
|    |    | PI 40:6(18:0/22:6)                           | 909.5 / 241.1 | 19.06 | -65 | 1.08  | negative |

|    |    |                                           |               |       |     |       |          |
|----|----|-------------------------------------------|---------------|-------|-----|-------|----------|
| GL |    | PI 40:7(18:1/22:6)                        | 907.5 / 241.1 | 19.18 | -65 | 2.08  | negative |
|    |    | PI 40:8(20:4/20:4)                        | 905.5 / 241.1 | 19.15 | -65 | 9.33  | negative |
|    |    | PI 41:6(19:0/22:6)                        | 923.5 / 241.1 | 18.57 | -65 | 5.70  | negative |
|    | PG | PG30:0(14:0/16:0)                         | 693.5 / 227.0 | 12.27 | -35 | 5.87  | negative |
|    |    | PG30:1(14:0/16:1)                         | 691.5 / 227.0 | 12.27 | -35 | 4.52  | negative |
|    |    | PG31:0(16:0e/16:0)                        | 707.5 / 227.0 | 9.91  | -35 | 1.09  | negative |
|    |    | PG31:1 p(16:0p/16:0)                      | 705.5 / 227.0 | 12.15 | -35 | 2.97  | negative |
|    |    | PG32:0(16:0/16:0)                         | 721.5 / 227.0 | 9.87  | -35 | 0.27  | negative |
|    |    | PG32:1(14:0/18:1) or (16:0/16:1)          | 719.5 / 227.0 | 10    | -35 | 0.52  | negative |
|    |    | PG32:2(14:0/18:2) or (16:1/16:1)          | 717.5 / 227.0 | 9.9   | -35 | 13.64 | negative |
|    |    | PG33:0 e(18:0e/16:0)                      | 735.5 / 227.0 | 10.02 | -35 | 17.29 | negative |
|    |    | PG33:1 e(18:0e/16:1) or (18:1e/16:0)      | 733.5 / 227.0 | 7.27  | -35 | 16.92 | negative |
|    |    | PG33:2 e(16:1e/18:1)                      | 731.5 / 227.0 | 9.39  | -35 | 7.84  | negative |
|    |    | PG34:0(16:0/18:0)                         | 749.5 / 227.0 | 9.94  | -35 | 4.00  | negative |
|    |    | PG34:1(16:0/18:1)                         | 747.5 / 227.0 | 10    | -35 | 0.92  | negative |
|    |    | PG34:2(16:0/18:2) or (16:1/18:1)          | 745.5 / 227.0 | 10.01 | -35 | 1.11  | negative |
|    |    | PG34:3(16:0/18:3) or (16:1/18:2)          | 743.5 / 227.0 | 9.98  | -35 | 1.13  | negative |
|    |    | PG34:4(14:0/20:4)                         | 741.5 / 227.0 | 9.9   | -35 | 2.66  | negative |
|    |    | PG34:5(14:0/20:5)                         | 739.5 / 227.0 | 9.9   | -35 | 5.42  | negative |
|    |    | PG35:1(16:0/19:1)or(17:0/18:1)            | 761.5 / 227.0 | 9.99  | -35 | 2.14  | negative |
|    |    | PG35:2 e(16:0e/20:2)                      | 759.5 / 227.0 | 10.02 | -35 | 3.73  | negative |
|    |    | PG35:3(17:1/18:2)                         | 757.5 / 227.0 | 9.97  | -35 | 15.30 | negative |
|    |    | PG35:4(15:0/20:4)                         | 755.5 / 227.0 | 9.98  | -35 | 7.84  | negative |
|    |    | PG35:5(15:0/20:5)                         | 753.5 / 227.0 | 10.02 | -35 | 9.38  | negative |
|    |    | PG36:0 p(16:0p/22:6)                      | 777.5 / 227.0 | 10    | -35 | 5.86  | negative |
|    |    | PG36:1(18:0/18:1)                         | 775.5 / 227.0 | 9.93  | -35 | 10.60 | negative |
|    |    | PG36:2(18:0/18:2) or (18:1/18:1)          | 773.5 / 227.0 | 9.88  | -35 | 8.02  | negative |
|    |    | PG36:3(18:1/18:2)                         | 771.5 / 227.0 | 9.97  | -35 | 0.67  | negative |
|    |    | PG36:4(16:0/20:4) or (16:1/20:3)          | 769.5 / 227.0 | 10.02 | -35 | 0.81  | negative |
|    |    | PG36:5(14:0/22:5)or(16:0/20:5)or16:1/20:4 | 767.5 / 227.0 | 10.53 | -35 | 1.28  | negative |
|    |    | PG36:6(14:0/22:6)                         | 765.5 / 227.0 | 9.95  | -35 | 1.17  | negative |
|    |    | PG37:1(18:0/19:1) or (19:0/18:1)          | 789.5 / 227.0 | 9.9   | -35 | 7.14  | negative |
|    |    | PG37:2(18:1/19:1) or (18:2/19:0)          | 787.5 / 227.0 | 9.95  | -35 | 1.33  | negative |

|           |                   |                                       |               |       |      |          |          |
|-----------|-------------------|---------------------------------------|---------------|-------|------|----------|----------|
| <b>GL</b> | <b>PG</b>         | PG37:3(17:0/20:3) or (19:1/18:2)      | 785.5 / 227.0 | 9.93  | -35  | 13.97    | negative |
|           |                   | PG37:4(17:0/20:4)                     | 783.5 / 227.0 | 10.02 | -35  | 5.04     | negative |
|           |                   | PG37:5 e( 16:0e/22:5) or (18:0e/20:5) | 781.5 / 227.0 | 9.9   | -35  | 0.20     | negative |
|           |                   | PG37:6(15:0/22:6)                     | 779.5 / 227.0 | 9.88  | -35  | 0.75     | negative |
|           |                   | PG38:1(18:1/20:0)                     | 803.5 / 227.0 | 9.92  | -35  | 3.19     | negative |
|           |                   | PG38:2(16:0/22:2)                     | 801.5 / 227.0 | 10.02 | -35  | 5.64     | negative |
|           |                   | PG38:3(18:0/20:3) or (18:1/20:2)      | 799.5 / 227.0 | 9.95  | -35  | 3.75     | negative |
|           |                   | PG38:4(18:0/20:4)                     | 797.5 / 227.0 | 9.92  | -35  | 3.49     | negative |
|           |                   | PG38:5(18:0/20:5)                     | 795.5 / 227.0 | 9.96  | -35  | 3.28     | negative |
|           |                   | PG38:6 (18:2/20:4)                    | 793.5 / 227.0 | 9.98  | -35  | 13.02    | negative |
|           |                   | PG38:7(16:1/22:6) or (18:2/20:5)      | 791.5 / 227.0 | 6.1   | -35  | 1.06     | negative |
|           |                   | PG39:3( 19:0/20:3)                    | 813.5 / 227.0 | 10.06 | -35  | 1.43     | negative |
|           |                   | PG39:6(17:0/22:6)                     | 807.5 / 227.0 | 9.93  | -35  | 0.81     | negative |
|           |                   | PG39:7(17:1/22:6)                     | 805.5 / 227.0 | 10.4  | -35  | 7.70     | negative |
|           |                   | PG40:1(18:1/22:0)                     | 831.5 / 227.0 | 10.02 | -35  | 25.30    | negative |
|           |                   | PG40:4(18:0/22:4 )or (20:1/20:3)      | 825.5 / 227.0 | 9.96  | -35  | 24.22    | negative |
|           |                   | PG40:5(18:0/22:5)                     | 823.5 / 227.0 | 10.02 | -35  | 14.86    | negative |
|           |                   | PG40:6(18:0/22:6)                     | 821.5 / 227.0 | 9.9   | -35  | 3.19     | negative |
|           |                   | PG40:7(18:1/22:6)                     | 819.5 / 227.0 | 5.98  | -35  | 3.07     | negative |
|           |                   | PG40:8(20:4/20:4)                     | 817.5 / 227.0 | 10.02 | -35  | 3.76     | negative |
|           | PG41:6(19:0/22:6) | 835.5 / 227.0                         | 9.98          | -35   | 8.98 | negative |          |
|           | <b>PS</b>         | PS30:0(14:0/16:0)                     | 706.5 / 619.5 | 26.49 | -25  | 12.94    | negative |
|           |                   | PS30:1(14:0/16:1)                     | 704.5 / 617.5 | 26.63 | -25  | 6.92     | negative |
|           |                   | PS31:0(16:0e/16:0)                    | 720.5 / 633.5 | 26.2  | -25  | 8.17     | negative |
|           |                   | PS31:1(16:0p/16:0)                    | 718.5 / 631.5 | 24.39 | -25  | 4.72     | negative |
|           |                   | PS32:0(16:0/16:0)                     | 734.5 / 647.5 | 25.87 | -25  | 2.24     | negative |
|           |                   | PS32:1(14:0/18:1)or(16:0/16:1)        | 732.5 / 645.5 | 25.86 | -25  | 2.36     | negative |
|           |                   | PS32:2(14:0/18:2)                     | 730.5 / 643.5 | 25.98 | -25  | 0.07     | negative |
|           |                   | PS33:0(18:0e/16:0)                    | 748.5 / 661.5 | 25.57 | -25  | 10.64    | negative |
|           |                   | PS33:1(15:0/18:1)                     | 746.5 / 659.5 | 25.56 | -25  | 11.19    | negative |
|           |                   | PS33:2(15:0/18:2)                     | 744.5 / 657.5 | 24.03 | -25  | 4.18     | negative |
|           |                   | PS34:0(15:0/18:2)                     | 762.5 / 675.5 | 25.23 | -25  | 3.91     | negative |
|           |                   | PS34:1(16:0/18:1)                     | 760.5 / 673.5 | 25.23 | -25  | 5.26     | negative |

|    |    |                                   |               |       |     |       |          |
|----|----|-----------------------------------|---------------|-------|-----|-------|----------|
| GL | PS | PS34:2(16:0/18:2)or(16:1/18:1)    | 758.5 / 671.5 | 25.39 | -25 | 0.16  | negative |
|    |    | PS34:3(16:0/18:3)                 | 756.5 / 669.5 | 25.58 | -25 | 2.81  | negative |
|    |    | PS34:4(14:0/20:4)or(16:1/18:3)    | 754.5 / 667.5 | 25.78 | -25 | 12.60 | negative |
|    |    | PG34:5(14:0/20:5)                 | 752.5 / 665.5 | 28.41 | -25 | ND    | negative |
|    |    | PS35:1(17:0/18:1)                 | 774.5 / 687.5 | 24.96 | -25 | 0.73  | negative |
|    |    | PS35:2(17:0/18:2)                 | 772.5 / 685.5 | 25.08 | -25 | 2.52  | negative |
|    |    | PS35:3(17:1/18:2)                 | 770.5 / 683.5 | 25.28 | -25 | 4.32  | negative |
|    |    | PS35:4(15:0/20:4)                 | 768.5 / 681.5 | 23.84 | -25 | 3.94  | negative |
|    |    | PS35:5(15:0/20:5)                 | 766.5 / 679.5 | 23.91 | -25 | 6.69  | negative |
|    |    | PS36:0 p(16:0p/20:0)              | 790.5 / 703.5 | 24.56 | -25 | 0.25  | negative |
|    |    | PS36:1(16:0/20:1)or(18:0/18:1)    | 788.5 / 701.5 | 24.58 | -25 | 0.40  | negative |
|    |    | PS36:2(18:0/18:2)or(18:1/18:1)    | 786.5 / 699.5 | 24.78 | -25 | 2.35  | negative |
|    |    | PS36:3(18:1/18:2)                 | 784.5 / 697.5 | 25    | -25 | 2.91  | negative |
|    |    | PS36:4(16:0/20:4)                 | 782.5 / 695.5 | 24.89 | -25 | 3.96  | negative |
|    |    | PS36:5(16:1/20:4)                 | 780.5 / 693.5 | 25.45 | -25 | 4.76  | negative |
|    |    | PS36:6(16:1/20:5)                 | 778.5 / 691.5 | 24.72 | -25 | 0.30  | negative |
|    |    | PS37:1(18:0/19:1)or(19:0/18:1)    | 802.5 / 715.5 | 24.3  | -25 | 2.94  | negative |
|    |    | PS37:2(18:1/19:1)or(18:2/19:0)    | 800.5 / 713.5 | 24.51 | -25 | 6.05  | negative |
|    |    | PS37:3(17:0/20:3)or(19:1/18:2)    | 798.5 / 711.5 | 24.79 | -25 | 4.57  | negative |
|    |    | PS37:4(17:0/20:4)                 | 796.5 / 709.5 | 24.55 | -25 | 2.97  | negative |
|    |    | PS37:5e(16:0e/22:5)or(18:0e/20:5) | 794.5 / 707.5 | 23.68 | -25 | 6.62  | negative |
|    |    | PS37:6(15:0/22:6)                 | 792.5 / 705.5 | 24.64 | -25 | 1.17  | negative |
|    |    | PS38:1(18:1/20:0)                 | 816.5 / 729.5 | 24.06 | -25 | 4.94  | negative |
|    |    | PS38:2(16:0/22:2)                 | 814.5 / 727.5 | 24.16 | -25 | 3.53  | negative |
|    |    | PS38:3(18:0/20:3)                 | 812.5 / 725.5 | 24.32 | -25 | 5.10  | negative |
|    |    | PS38:4(18:0/20:4)                 | 810.5 / 723.5 | 24.22 | -25 | 1.39  | negative |
|    |    | PS38:5(18:0/20:5)                 | 808.5 / 721.5 | 24.68 | -25 | 10.06 | negative |
|    |    | PS38:6(16:0/22:6) or (18:2/20:4)  | 806.5 / 719.5 | 24.94 | -25 | 11.36 | negative |
|    |    | PS38:7(16:1/22:6) or (18:2/20:5)  | 804.5 / 717.5 | 24.46 | -25 | 8.55  | negative |
|    |    | PS39:3(19:0/20:3)                 | 826.5 / 739.5 | 23.95 | -25 | 1.72  | negative |
|    |    | PS39:6(17:0/22:6)                 | 820.5 / 733.5 | 24.69 | -25 | 1.66  | negative |
|    |    | PS39:7(17:1/22:6)                 | 818.5 / 731.5 | 24.05 | -25 | 6.62  | negative |
|    |    | PS40:1(18:1/22:0)                 | 844.5 / 757.5 | 23.52 | -25 | 6.89  | negative |

|    |    |                                             |               |       |     |       |          |
|----|----|---------------------------------------------|---------------|-------|-----|-------|----------|
| GL |    | PS40:4(18:0/22:4) or( 20:1/20:3)            | 838.5 / 751.5 | 23.98 | -25 | 7.35  | negative |
|    |    | PS40:5(18:0/22:5)                           | 836.5 / 749.5 | 24.16 | -25 | 0.16  | negative |
|    |    | PS40:6(18:0/22:6)                           | 834.5 / 747.5 | 24.23 | -25 | 1.47  | negative |
|    |    | PS40:7(18:1/22:6)                           | 832.5 / 745.5 | 24.44 | -25 | 8.20  | negative |
|    |    | PS40:8(20:4/20:4)                           | 830.5 / 743.5 | 23.93 | -25 | 10.51 | negative |
|    |    | PS41:6(19:0/22:6)                           | 848.5 / 761.5 | 24.07 | -25 | 14.33 | negative |
|    | PA | PA 30:0(18:0/12:0)                          | 619.4 / 199.2 | 27.03 | -50 | 10.30 | negative |
|    |    | PA 30:0(16:0/14:0)                          | 619.4 / 227.2 | 29.77 | -50 | 1.60  | negative |
|    |    | PA 30:1(16:1/14:0)                          | 617.4 / 153.0 | 29.16 | -50 | 2.56  | negative |
|    |    | PA 31:0(16:0e/16:0)                         | 633.4 / 153.0 | 23.28 | -50 | 14.13 | negative |
|    |    | PA 31:1p(16:0p/16:0)                        | 631.4 / 153.0 | 20.28 | -50 | 5.59  | negative |
|    |    | PA 32:0(16:0/16:0)                          | 647.4 / 153.0 | 28.54 | -50 | 4.31  | negative |
|    |    | PA 32:1(14:0/18:1) or (16:0/16:1)           | 645.4 / 153.0 | 22.6  | -50 | 3.20  | negative |
|    |    | PA 32:2(14:0/18:2) or (16:1/16:1)           | 643.4 / 153.0 | 28.25 | -50 | 13.11 | negative |
|    |    | PA 33:0e(18:0e/16:0)                        | 661.4 / 153.0 | 37.04 | -50 | 1.68  | negative |
|    |    | PA 33:1e(18:0e/16:1) or (18:1e/16:0)        | 659.4 / 153.0 | 28.79 | -50 | 1.55  | negative |
|    |    | PA 33:2e(16:1e/18:1)                        | 657.4 / 153.0 | 40.17 | -50 | 11.75 | negative |
|    |    | PA 34:0(16:0/18:0)                          | 675.4 / 153.0 | 22.04 | -50 | 2.82  | negative |
|    |    | PA 34:1(16:0/18:1)                          | 673.4 / 153.0 | 22.08 | -50 | 6.39  | negative |
|    |    | PA 34:2(16:0/18:2) or (16:1/18:1)           | 671.4 / 153.0 | 22.3  | -50 | 12.84 | negative |
|    |    | PA 34:3(16:0/18:3) or (16:1/18:2)           | 669.4 / 153.0 | 22.53 | -50 | 19.38 | negative |
|    |    | PA 34:4(14:0/20:4) or (16:1/18:3)           | 667.4 / 153.0 | 37.42 | -50 | 25.92 | negative |
|    |    | PA 34:5(14:0/20:5)                          | 665.4 / 153.0 | 37.79 | -50 | ND    | negative |
|    |    | PA35:1(16:0/19:1)or(17:0/18:1)or(17:1/18:0) | 687.4 / 153.0 | 21.74 | -50 | 8.93  | negative |
|    |    | PA 35:2e(16:0e/20:2)                        | 685.4 / 153.0 | 22.03 | -50 | 8.88  | negative |
|    |    | PA 35:3(17:1/18:2)                          | 683.4 / 153.0 | 45.18 | -50 | 0.89  | negative |
|    |    | PA 35:4(15:0/20:4)                          | 681.4 / 153.0 | 0.26  | -50 | 7.83  | negative |
|    |    | PA 35:5(15:0/20:5)                          | 679.4 / 153.0 | 25.28 | -50 | 7.57  | negative |
|    |    | PA 36:0p(16:0p/20:0)                        | 703.4 / 153.0 | 21.53 | -50 | 2.90  | negative |
|    |    | PA 36:1(18:0/18:1)                          | 701.4 / 153.0 | 21.49 | -50 | 2.75  | negative |
|    |    | PA 36:2(18:0/18:2) or (18:1/18:1)           | 699.4 / 153.0 | 21.64 | -50 | 5.63  | negative |
|    |    | PA36:3(16:0/20:3)or(18:0/18:3)or(18:1/18:2) | 697.4 / 153.0 | 21.66 | -50 | 3.79  | negative |
|    |    | PA 36:4(16:0/20:4) or (16:1/20:3)           | 695.4 / 153.0 | 21.87 | -50 | 7.52  | negative |

|           |                    |                                             |               |       |       |          |          |
|-----------|--------------------|---------------------------------------------|---------------|-------|-------|----------|----------|
| <b>GL</b> | <b>PA</b>          | PA36:5(14:0/22:5)or(16:0/20:5)or(16:1/20:4) | 693.4 / 153.0 | 25.28 | -50   | 12.47    | negative |
|           |                    | PA 36:6(14:0/22:6)                          | 691.4 / 153.0 | 21.41 | -50   | 8.33     | negative |
|           |                    | PA 37:1; PA 18:0/19:1 or 19:0/18:1          | 715.4 / 153.0 | 21.5  | -50   | 12.24    | negative |
|           |                    | PA 37:2(18:1/19:1) or (18:2/19:0)           | 713.4 / 153.0 | 21.51 | -50   | 7.95     | negative |
|           |                    | PA 37:3(17:0/20:3) or (19:1/18:2)           | 711.4 / 153.0 | 21.22 | -50   | 4.77     | negative |
|           |                    | PA 37:4(17:0/20:4)                          | 709.4 / 153.0 | 9.52  | -50   | 10.53    | negative |
|           |                    | PA 37:5e(16:0e/22:5) or (18:0e/20:5)        | 707.4 / 153.0 | 10.9  | -50   | 24.42    | negative |
|           |                    | PA 37:6(15:0/22:6)                          | 705.4 / 153.0 | 21.15 | -50   | 11.94    | negative |
|           |                    | PA 38:1(18:1/20:0)                          | 729.4 / 153.0 | 20.87 | -50   | 1.00     | negative |
|           |                    | PA 38:2(16:0/22:2)                          | 727.4 / 153.0 | 21.17 | -50   | 6.61     | negative |
|           |                    | PA 38:3(18:0/20:3) or (18:1/20:2)           | 725.4 / 153.0 | 21.3  | -50   | 6.37     | negative |
|           |                    | PA 38:4(18:0/20:4)                          | 723.4 / 153.0 | 21.22 | -50   | 3.28     | negative |
|           |                    | PA 38:5(18:0/20:5)                          | 721.4 / 153.0 | 21.61 | -50   | 4.04     | negative |
|           |                    | PA 38:6(16:0/22:6) or (18:2/20:4)           | 719.4 / 153.0 | 22.03 | -50   | 9.46     | negative |
|           |                    | PA 38:7(16:1/22:6) or (18:2/20:5)           | 717.4 / 153.0 | 23.28 | -50   | 7.11     | negative |
|           |                    | PA 39:3(19:0/20:3)                          | 739.4 / 153.0 | 20.87 | -50   | 1.78     | negative |
|           |                    | PA 39:6(17:0/22:6)                          | 733.4 / 153.0 | 22.72 | -50   | 12.08    | negative |
|           |                    | PA 39:7(17:1/22:6)                          | 731.4 / 153.0 | 21.03 | -50   | 1.81     | negative |
|           |                    | PA 40:1(18:1/22:0)                          | 757.4 / 153.0 | 20.26 | -50   | 2.61     | negative |
|           |                    | PA 40:4(18:0/22:4) or (20:1/20:3)           | 751.4 / 153.0 | 20.87 | -50   | 2.66     | negative |
|           |                    | PA 40:5(18:0/22:5)                          | 749.4 / 153.0 | 21.18 | -50   | 7.11     | negative |
|           |                    | PA 40:6(18:0/22:6)                          | 747.4 / 153.0 | 21.2  | -50   | 2.07     | negative |
|           |                    | PA 40:7(18:1/22:6)                          | 745.4 / 153.0 | 21.63 | -50   | 3.52     | negative |
|           |                    | PA 40:8(20:4/20:4)                          | 743.4 / 153.0 | 25.04 | -50   | 1.51     | negative |
|           | PA 41:6(19:0/22:6) | 761.4 / 153.0                               | 22.03         | -50   | 10.01 | negative |          |
|           | <b>lysoPI</b>      | lysoPI 14:0 (sn-2)                          | 543.3 / 241.1 | 37.11 | -65   | 3.75     | negative |
|           |                    | lysoPI 15:0 (sn-2)                          | 557.3 / 241.1 | 33.85 | -65   | 11.68    | negative |
|           |                    | lysoPI 15:1 (sn-1)                          | 555.3 / 241.1 | 28.29 | -65   | 3.76     | negative |
|           |                    | lysoPI 16:0 (sn-2)                          | 571.3 / 241.1 | 30.04 | -65   | 9.17     | negative |
|           |                    | lysoPI 16:1 (sn-1)                          | 569.3 / 241.1 | 30.54 | -65   | 8.88     | negative |
|           |                    | lysoPI 17:0 (sn-1)                          | 585.3 / 241.1 | 24.66 | -65   | 8.57     | negative |
|           |                    | lysoPI 17:1 (sn-1)                          | 583.3 / 241.1 | 28.66 | -65   | 7.28     | negative |
|           |                    | lysoPI 18:0 (sn-1)                          | 599.3 / 241.1 | 28.79 | -65   | 12.38    | negative |

|                  |               |                    |               |       |          |       |          |
|------------------|---------------|--------------------|---------------|-------|----------|-------|----------|
| <b>GL</b>        | <b>lysoPI</b> | lysoPI 18:1 (sn-1) | 597.3 / 241.1 | 29.41 | -65      | 12.55 | negative |
|                  |               | lysoPI 18:2 (sn-1) | 595.3 / 241.1 | 28.66 | -65      | 9.00  | negative |
|                  |               | lysoPI 18:3 (sn-1) | 593.3 / 241.1 | 30.16 | -65      | 11.44 | negative |
|                  |               | lysoPI 19:0 (sn-1) | 613.2 / 241.1 | 28.22 | -65      | 5.94  | negative |
|                  |               | lysoPI 20:0 (sn-1) | 617.3 / 241.1 | 30.16 | -65      | 5.46  | negative |
|                  |               | lysoPI 20:1 (sn-1) | 615.3 / 241.1 | 28.39 | -65      | ND    | negative |
|                  |               | lysoPI 20:2 (sn-1) | 613.3 / 241.1 | 28.49 | -65      | 6.16  | negative |
|                  |               | lysoPI 20:3 (sn-1) | 611.3 / 241.1 | 28.66 | -65      | 4.12  | negative |
|                  |               | lysoPI 20:4 (sn-1) | 609.3 / 241.1 | 27.91 | -65      | 19.90 | negative |
|                  |               | lysoPI 20:5 (sn-1) | 607.3 / 241.1 | 29.16 | -65      | 15.93 | negative |
|                  |               | lysoPI 22:0 (sn-1) | 655.4 / 241.1 | 29.79 | -65      | 15.53 | negative |
|                  |               | lysoPI 22:4 (sn-1) | 647.3 / 241.1 | 28.91 | -65      | 2.78  | negative |
|                  |               | lysoPI 22:6 (sn-1) | 643.3 / 241.1 | 28.49 | -65      | 11.11 | negative |
|                  | <b>lysoPG</b> | lysoPG14:0(sn-2)   | 455.3 / 227.0 | 19.53 | -35      | 0.14  | negative |
|                  |               | lysoPG15:0(sn-2)   | 469.3 / 227.0 | 12.9  | -35      | 15.24 | negative |
|                  |               | lysoPG15:1 (sn-1)  | 467.3 / 227.0 | 1.01  | -35      | 4.78  | negative |
|                  |               | lysoPG16:0(sn-2)   | 483.3 / 227.0 | 18.28 | -35      | 2.05  | negative |
|                  |               | lysoPG16:1(sn-1)   | 481.3 / 227.0 | 18.78 | -35      | 6.49  | negative |
|                  |               | lysoPG17:0(sn-1)   | 497.3 / 227.0 | 18.15 | -35      | 3.76  | negative |
|                  |               | lysoPG17:1(sn-1)   | 495.3 / 227.0 | 15.53 | -35      | 11.94 | negative |
|                  |               | lysoPG18:0(sn-1)   | 511.3 / 227.0 | 17.28 | -35      | 4.94  | negative |
|                  |               | lysoPG18:1(sn-1)   | 509.3 / 227.0 | 17.78 | -35      | 0.74  | negative |
|                  |               | lysoPG18:2(sn-1)   | 507.3 / 227.0 | 18.15 | -35      | 11.94 | negative |
|                  |               | lysoPG18:3(sn-1)   | 505.3 / 227.0 | 17.78 | -35      | 11.59 | negative |
|                  |               | lysoPG19:0(sn-1)   | 525.3 / 227.0 | 16.53 | -35      | 11.92 | negative |
|                  |               | lysoPG20:0(sn-1)   | 539.3 / 227.0 | 18.28 | -35      | 7.02  | negative |
|                  |               | lysoPG20:1(sn-1)   | 537.3 / 227.0 | 17.03 | -35      | 6.77  | negative |
|                  |               | lysoPG20:2(sn-1)   | 535.3 / 227.0 | 17.53 | -35      | 18.03 | negative |
|                  |               | lysoPG20:3(sn-1)   | 533.3 / 227.0 | 17.9  | -35      | 12.35 | negative |
|                  |               | lysoPG20:4(sn-1)   | 531.3 / 227.0 | 17.65 | -35      | 6.04  | negative |
| lysoPG20:5(sn-1) | 529.3 / 227.0 | 22.53              | -35           | 9.54  | negative |       |          |
| lysoPG22:0(sn-1) | 567.4 / 227.0 | 15.27              | -35           | 9.13  | negative |       |          |



|                    |                  |                  |               |       |          |       |          |
|--------------------|------------------|------------------|---------------|-------|----------|-------|----------|
| <b>GL</b>          | <b>lysoPS</b>    | lysoPG22:4(sn-1) | 559.3 / 227.0 | 17.15 | -35      | 0.82  | negative |
|                    |                  | lysoPG22:6(sn-1) | 555.3 / 227.0 | 18.03 | -35      | 12.26 | negative |
|                    |                  | lysoPS14:0(sn-2) | 468.3 / 381.3 | 36.42 | -25      | 5.03  | negative |
|                    |                  | lysoPS15:0(sn-2) | 482.3 / 395.3 | 33.79 | -25      | 0.74  | negative |
|                    |                  | lysoPS15:1(sn-1) | 480.3 / 393.3 | 32.92 | -25      | 4.56  | negative |
|                    |                  | lysoPS16:0(sn-2) | 496.3 / 409.3 | 34.79 | -25      | 1.25  | negative |
|                    |                  | lysoPS16:1(sn-1) | 494.3 / 407.3 | 34.54 | -25      | 1.34  | negative |
|                    |                  | lysoPS17:0(sn-1) | 510.3 / 423.3 | 34.11 | -25      | 11.70 | negative |
|                    |                  | lysoPS17:1(sn-1) | 508.3 / 421.3 | 34.67 | -25      | 7.31  | negative |
|                    |                  | lysoPS18:0(sn-1) | 524.3 / 437.3 | 33.29 | -25      | 3.93  | negative |
|                    |                  | lysoPS18:1(sn-1) | 522.3 / 435.3 | 34.04 | -25      | 2.97  | negative |
|                    |                  | lysoPS18:2(sn-1) | 520.3 / 433.3 | 34.43 | -25      | 5.19  | negative |
|                    |                  | lysoPS18:3(sn-1) | 518.3 / 431.3 | 34.42 | -25      | 4.85  | negative |
|                    |                  | lysoPS19:0(sn-1) | 538.3 / 451.3 | 32.29 | -25      | 2.67  | negative |
|                    |                  | lysoPS20:0(sn-1) | 552.3 / 465.3 | 35.42 | -25      | 14.11 | negative |
|                    |                  | lysoPS20:1(sn-1) | 550.3 / 463.3 | 32.79 | -25      | 1.64  | negative |
|                    |                  | lysoPS20:2(sn-1) | 548.3 / 461.3 | 32.29 | -25      | 0.86  | negative |
|                    |                  | lysoPS20:3(sn-1) | 546.3 / 459.3 | 33.17 | -25      | 4.00  | negative |
|                    |                  | lysoPS20:4(sn-1) | 544.3 / 457.3 | 34.17 | -25      | 5.02  | negative |
|                    |                  | lysoPS20:5(sn-1) | 542.3 / 455.3 | 34.92 | -25      | 5.04  | negative |
| lysoPS22:0(sn-1)   | 580.4 / 493.4    | 31.41            | -25           | 0.02  | negative |       |          |
| lysoPS22:4(sn-1)   | 572.4 / 485.4    | 32.29            | -25           | 0.14  | negative |       |          |
| lysoPS22:6(sn-1)   | 568.4 / 481.4    | 34.17            | -25           | 10.78 | negative |       |          |
| <b>Ceramide</b>    | <b>C1P</b>       | C1P120           | 560.6 / 78.9  | 26.66 | -65      | 4.90  | negative |
|                    |                  | C1P160           | 616.7 / 78.9  | 41.67 | -65      | 12.05 | negative |
|                    |                  | C1P240           | 728.9 / 78.9  | 37.92 | -70      | 5.69  | negative |
|                    |                  | DHC1P160         | 562.6 / 78.9  | 26.16 | -65      | 1.36  | negative |
|                    |                  | DHC1P240         | 730.9 / 78.9  | 15.53 | -72      | 12.18 | negative |
| <b>Glycolipids</b> | <b>Sulfatide</b> | SulfatideC120    | 722.5/96.9    | 6.47  | -100     | 12.26 | negative |
|                    |                  | SulfatideC160    | 778.6 / 96.9  | ND    | -100     | 1.36  | negative |
|                    |                  | SulfatideC240    | 890.0 / 96.9  | 7.18  | -100     | 5.13  | negative |

**RT<sup>#</sup>: Retention Time, CE<sup>\*</sup>: Collision Energy, RSD%: Relative Standard Deviation**

**Figure S1. PSL-DA model**

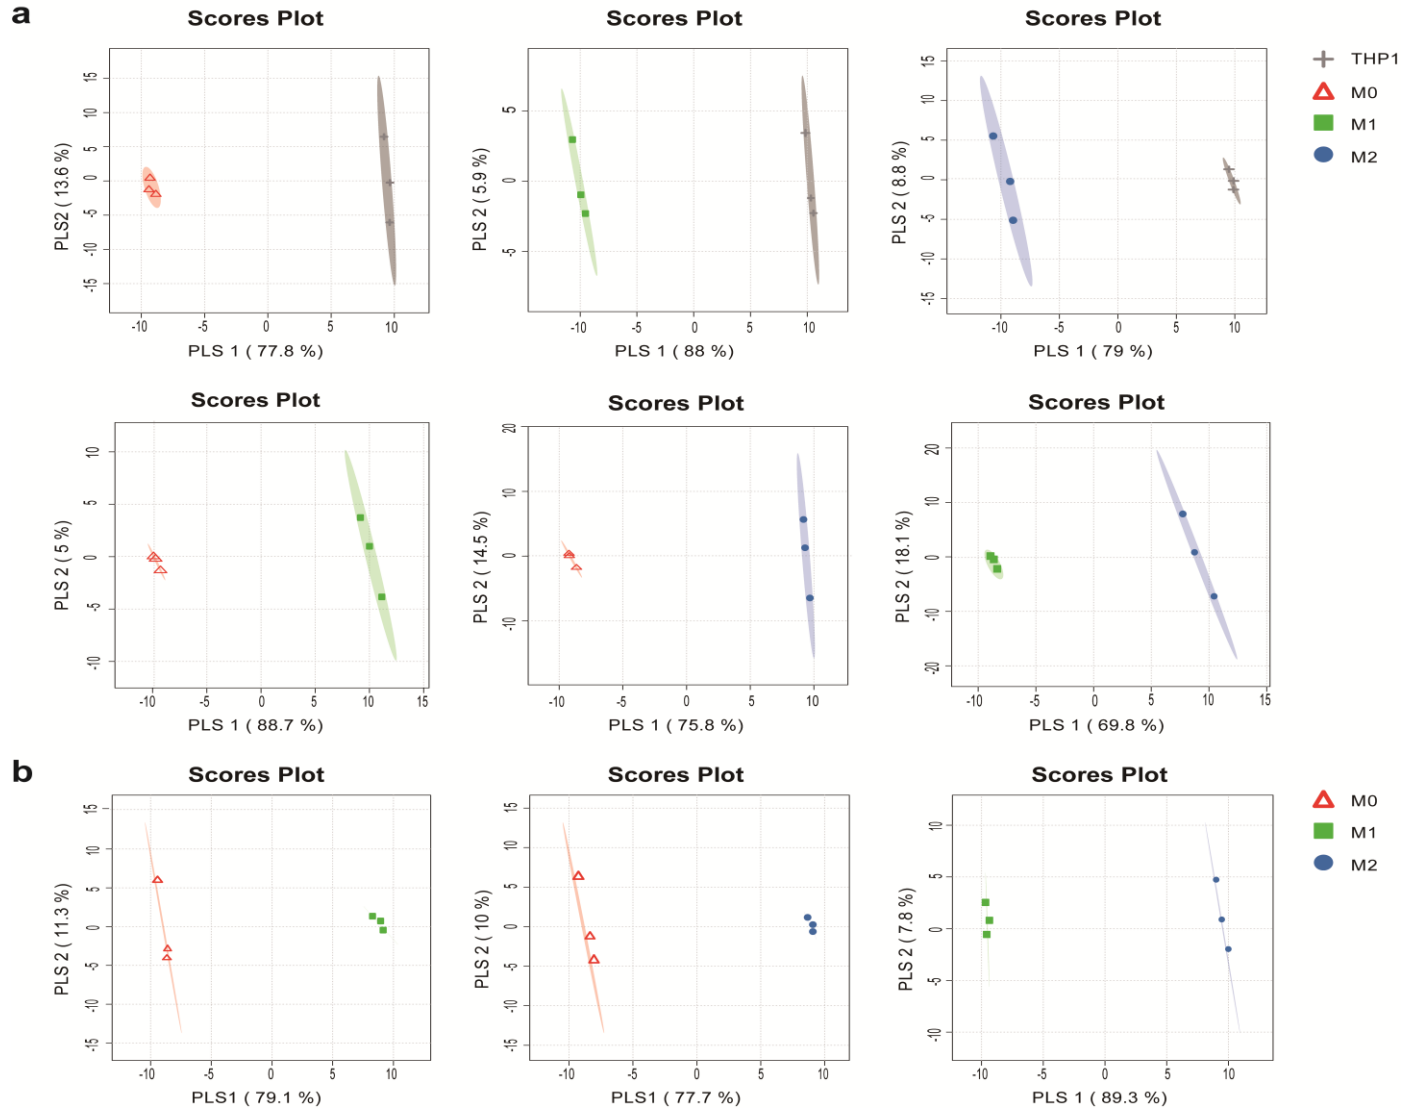

**Figure S2**

The changes of lipid species are observed during human primary monocyte derived macrophage differentiation and macrophage polarization

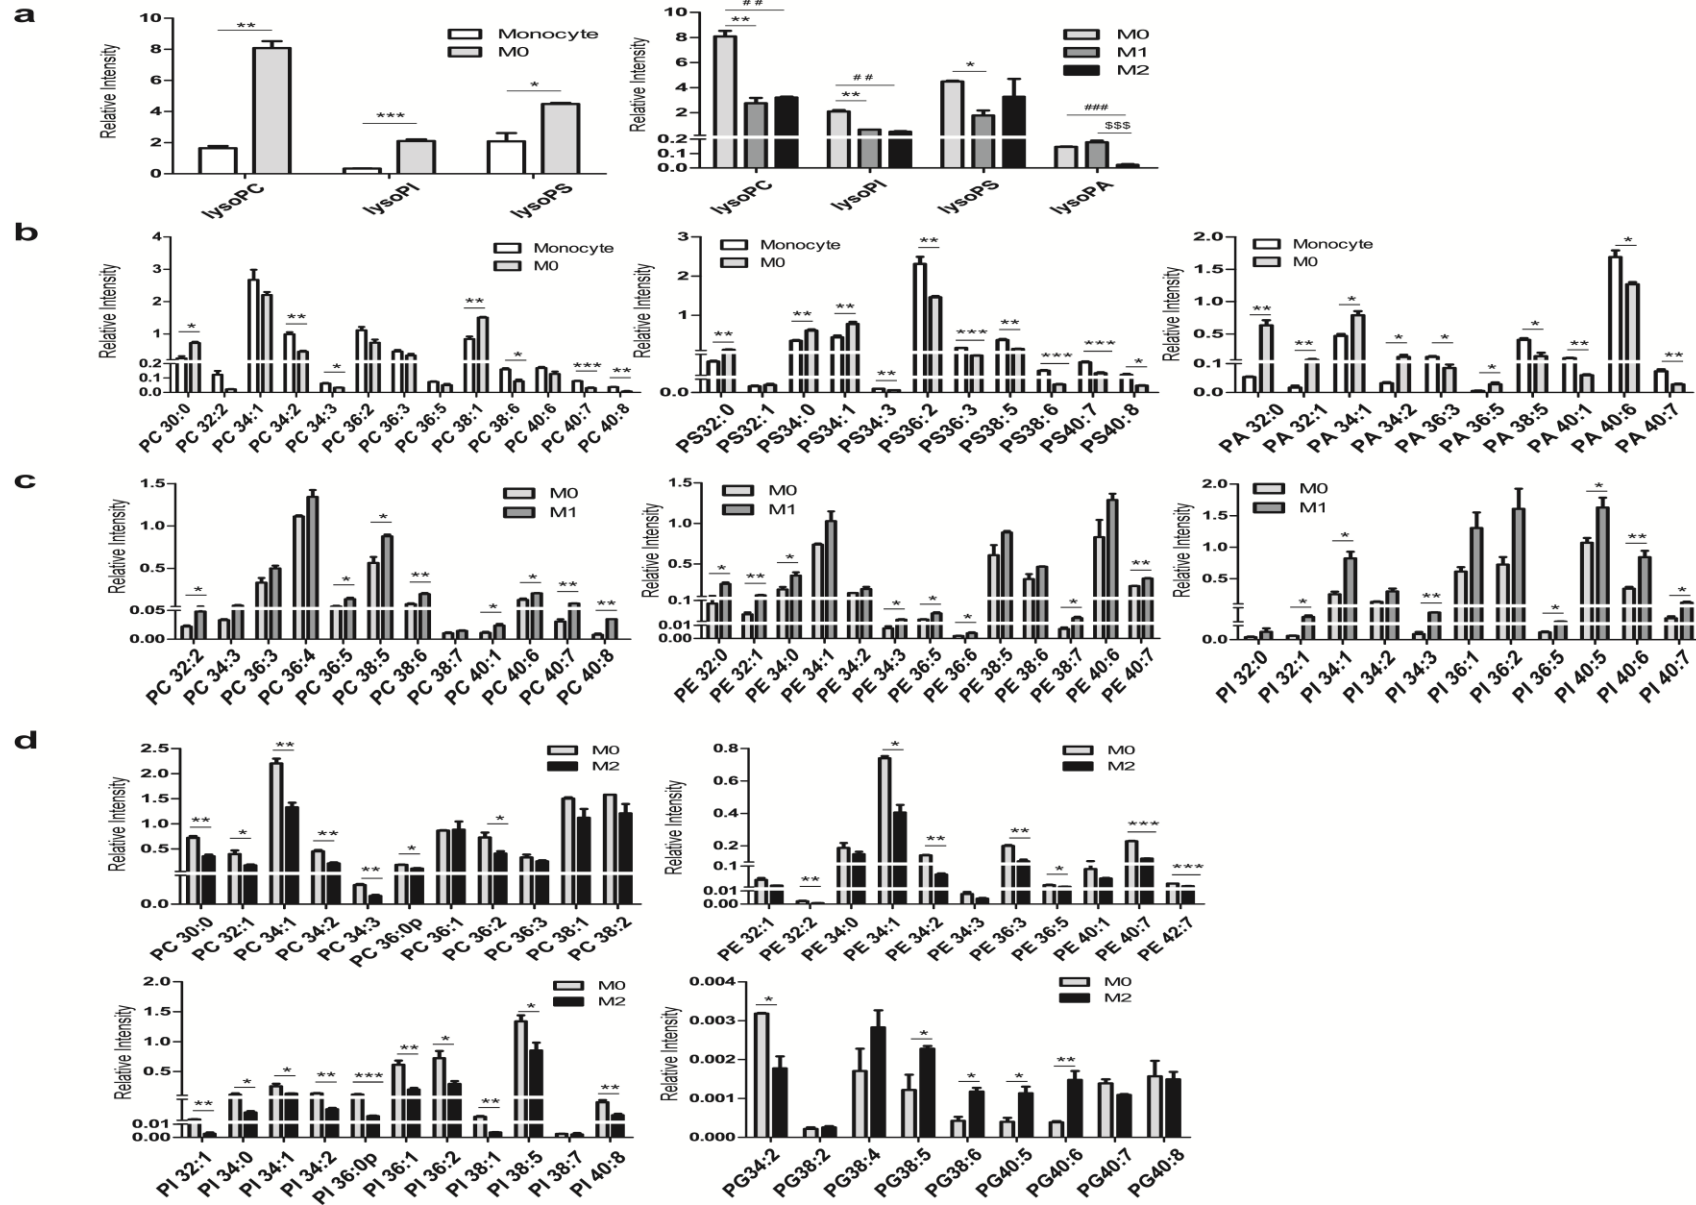

**Figure S3**

The changes of lysophospholipid molecular species are observed during THP-1 derived macrophage differentiation and macrophage polarization

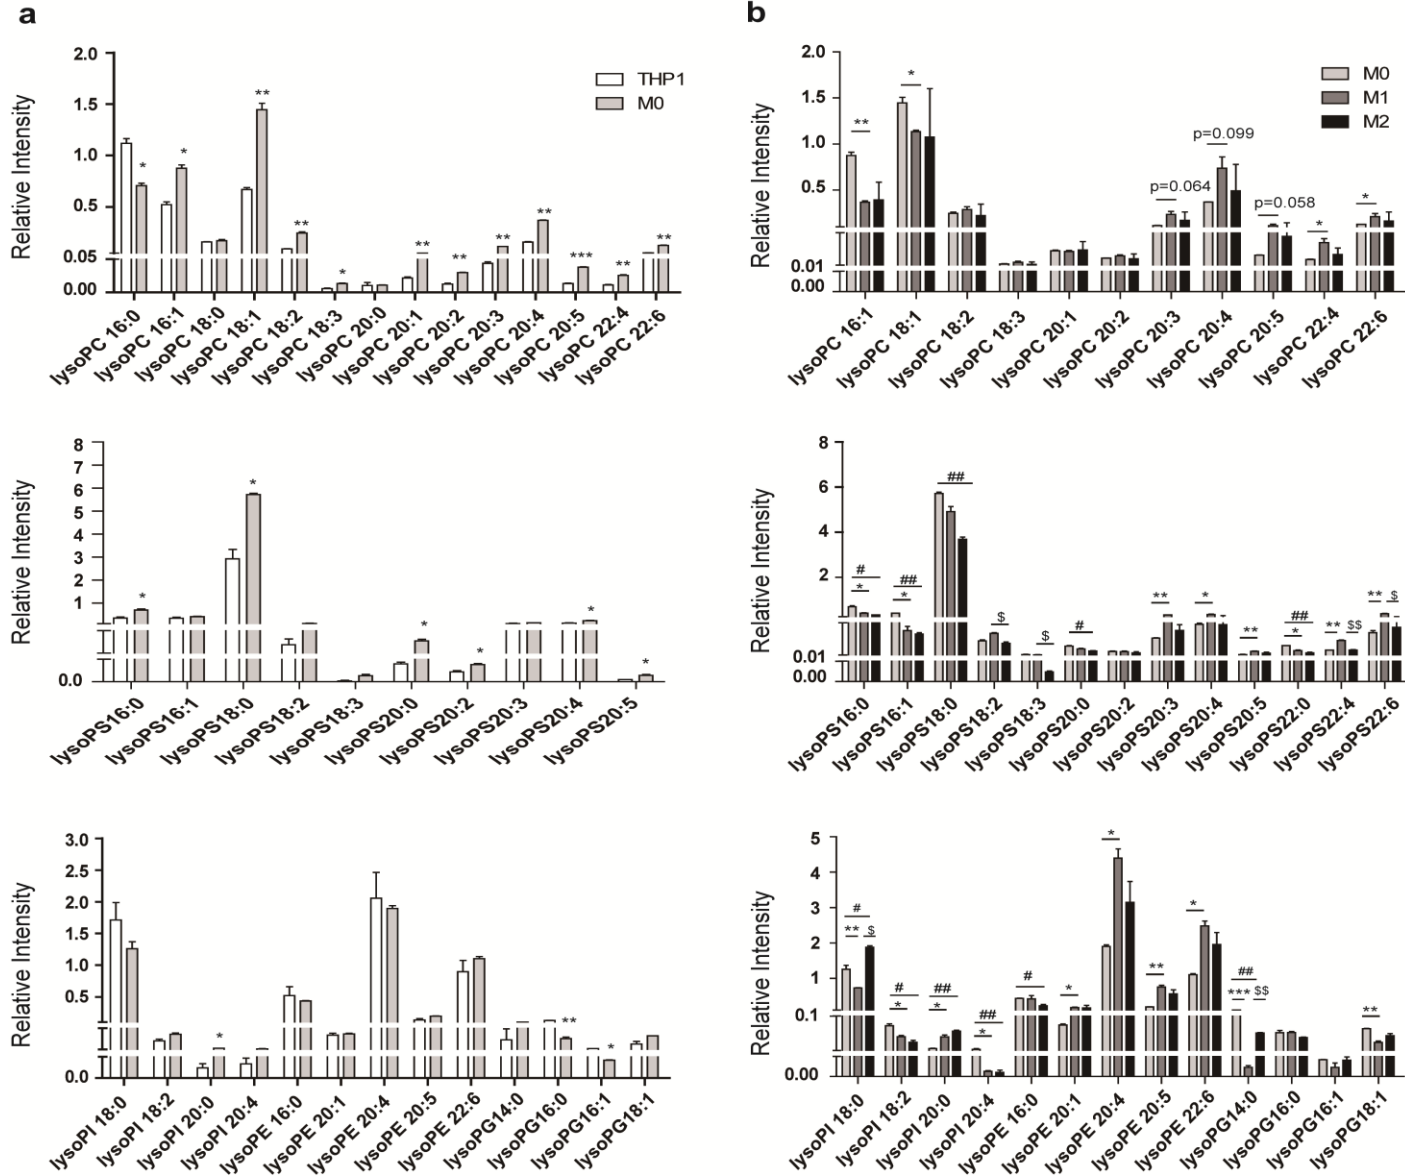

**Figure S4**

The variation of AA-containing lipid species during the courses of human monocyte-macrophage differentiation and macrophage polarization

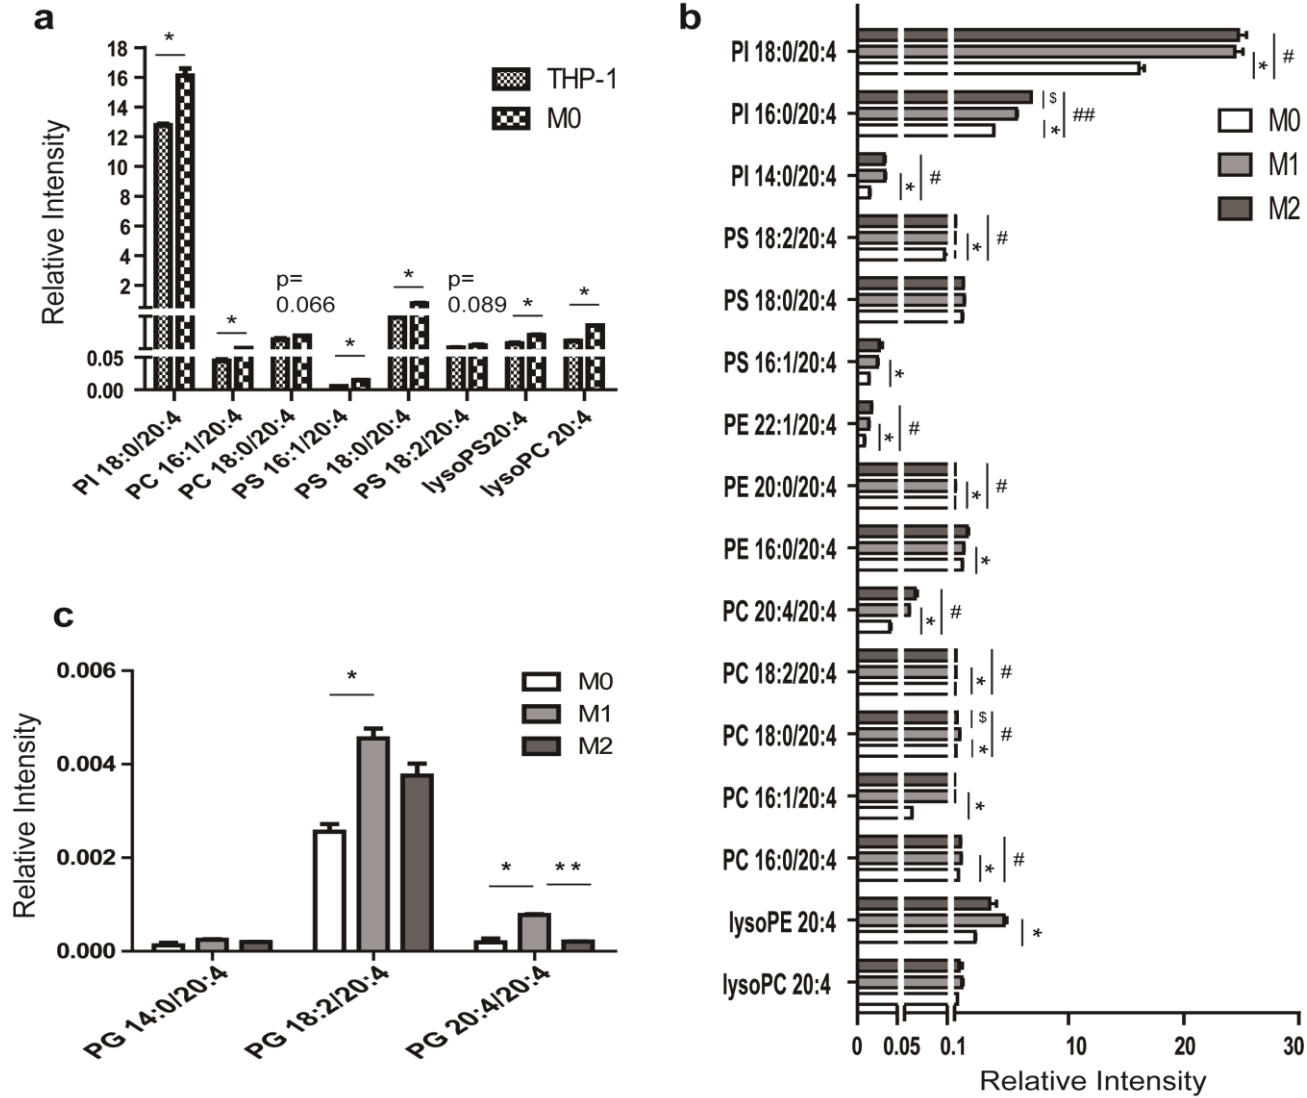

**Figure S5 The Liquid chromatographic separation conditions**

| Extract fraction                                                                                                                                                   | analytes                                                                                                                                                                                   | LC condition                                                                                                                                                                                                                                                                                                                                                                     |
|--------------------------------------------------------------------------------------------------------------------------------------------------------------------|--------------------------------------------------------------------------------------------------------------------------------------------------------------------------------------------|----------------------------------------------------------------------------------------------------------------------------------------------------------------------------------------------------------------------------------------------------------------------------------------------------------------------------------------------------------------------------------|
| 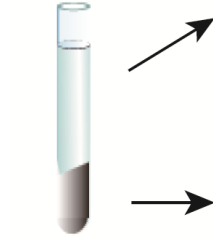 <p>Cell Lysate</p> <p>Upper: re extracted, then discard</p> <p>Lower: pooled</p> | <ul style="list-style-type: none"> <li>PC</li> <li>PE</li> <li>PS</li> <li>PG</li> <li>PI</li> <li>Ceramide</li> <li>S1P</li> <li>C1P</li> <li>Sphingomyelin</li> <li>Sulfatide</li> </ul> | <ol style="list-style-type: none"> <li>1. Total A flow: 0.3ml/min</li> <li>2. Pump B conc.: 50%</li> <li>3. 10ul total lipid extract</li> <li>4. column: silica column, 2.1x 250mm, 5um (Welch Ultimate<sup>®</sup>)</li> <li>5. Phase A : IPA:hexane:100mM NH<sub>4</sub>COOH ( v/v/v,58:40:2 )<br/>Phase B : IPA:hexane:100mM NH<sub>4</sub>COOH ( v/v/v,50:40:10 )</li> </ol> |

Figure S6

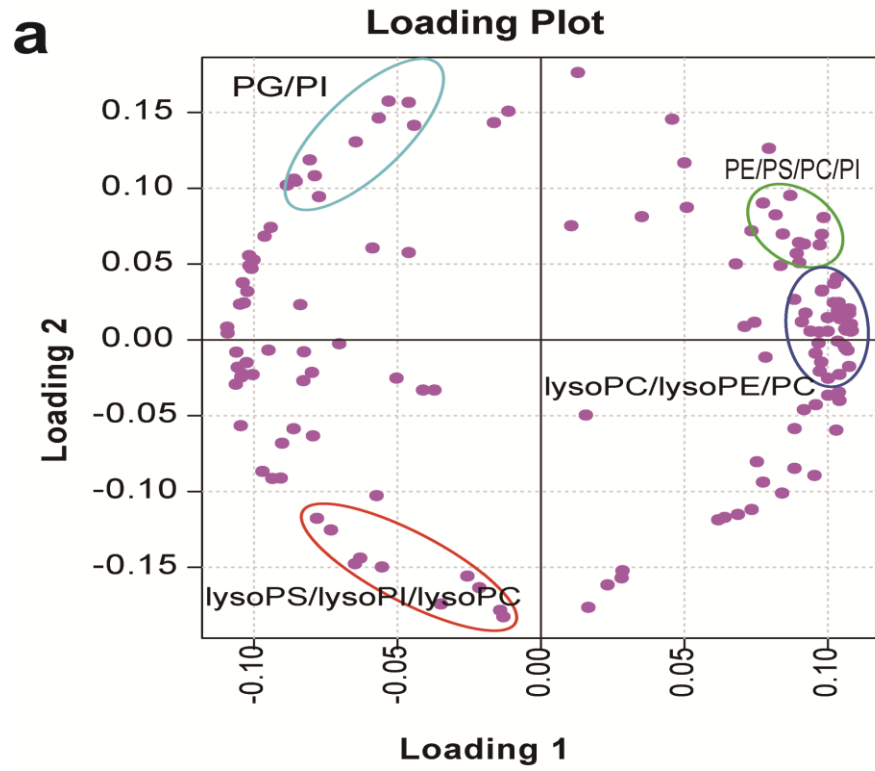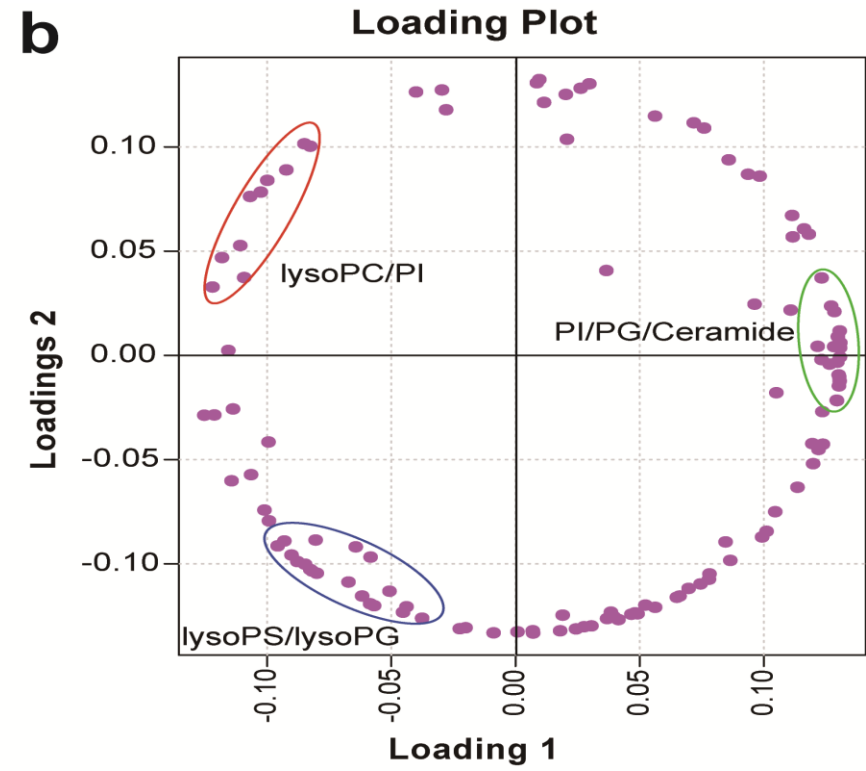

**Table S2. List of primer sequences used in qRT-PCR experiments**

| <b>Species</b> | <b>Genes</b>  | <b>Primers</b> | <b>Sequences</b>           |
|----------------|---------------|----------------|----------------------------|
| human          | CD11b         | Forward        | GTGAAGCCAATAACGCAGC        |
| human          | CD11b         | Reverse        | CTCCCATCCGTGATGACAAC       |
| human          | CD36          | Forward        | TGTAACCCAAGACGCTGAGG       |
| human          | CD36          | Reverse        | GAAGGTTCGAAGATGGCACC       |
| human          | CCL3          | Forward        | CAGCCAGGTGTCATTTTCCT       |
| human          | CCL3          | Reverse        | TCAGGCATTCAGTTCCAGGT       |
| human          | TNF- $\alpha$ | Forward        | TAGCCCATGTTGTAGCAAACC      |
| human          | TNF- $\alpha$ | Reverse        | ATGAGGTACAGGCCCTCTGAT      |
| human          | CCL17         | Forward        | ACTGCTCCAGGGATGCCATCGTTTTT |
| human          | CCL17         | Reverse        | ACAAGGGGATGGGATCTCCCTCACTG |
| human          | CCL22         | Forward        | TGATTACGATCCGTTACCGTCT     |
| human          | CCL22         | Reverse        | CCTGAAGGTTAGCAACACCAC      |
| human          | ACTIN         | Forward        | CCTAGAAGCATTTGCGGTGG       |
| human          | ACTIN         | Reverse        | GAGCTACGAGCTGCCTGACG       |
| mouse          | NOS2          | Forward        | AAACCCCTTGTGCTGTTCTC       |
| mouse          | NOS2          | Reverse        | ATACTGTGGACGGGTCGATG       |
| mouse          | CXCL10        | Forward        | AAGTGCTGCCGTCATTTTCT       |
| mouse          | CXCL10        | Reverse        | CCTATGGCCCTCATTCTCAC       |
| mouse          | Arg-1         | Forward        | GCAGAGGTCCAGAAGAATGG       |
| mouse          | Arg-1         | Reverse        | AGCATCCACCCAAATGACAC       |
| mouse          | Mrc-1         | Forward        | GGAGGCTGATTACGAGCAGT       |
| mouse          | Mrc-1         | Reverse        | CATAGGAAACGGGAGAACCA       |
| mouse          | ACTIN         | Forward        | GTGCTATGTTGCTCTAGACTTCG    |
| mouse          | ACTIN         | Reverse        | ATGCCACAGGATTCCATACC       |



**Table S3. Comparison of lipidomic characteristics among human THP-1, human PBMC and mouse RAW264.7 macrophage**

| Differentiation/Polarization process | Human THP-1                                                                                                    | Human PBMC                                                    | Mouse RAW264.7                           |
|--------------------------------------|----------------------------------------------------------------------------------------------------------------|---------------------------------------------------------------|------------------------------------------|
| Monocyte to M0                       | lysoPC and lysoPS ↑                                                                                            | lysoPC, lysoPS, lysoPI ↑<br>PUFA to MUFA (PC, PS, PA species) |                                          |
| M0 to M1                             | PE, PG ↑<br>lysoPI ↓ lysoPE ↑<br>MUFA to PUMA (PS, PC, PI species)<br>Fatty acid lengthen (PS, PC, PI species) | PC, PE, PI ↑<br>lysoPC, lysoPS, lysoPI ↓                      | PG, PC, PS ↑<br>lysoPG ↑, lysoPC ↓       |
| M0 to M2                             | PE, PG ↑<br>lysoPI ↑<br>MUFA to PUMA (PS, PC, PI species)<br>Fatty acid lengthen (PS, PC, PI species)          | PC, PE, PI ↓, PG ↑<br>lysoPC, lysoPI, lysoPA ↓                | PS, PE, PC ↑<br>lysoPS, lysoPG, lysoPI ↑ |

“↑”: the intensity of lipid was increased

“↓”: the intensity of lipid was decreased

### **Figure S1. PSL-DA model**

- (a) Human macrophage PLS-DA model.
- (b) Mouse macrophage PLS-DA model.

### **Figure S2**

#### **The changes of lipid species are observed during human primary monocyte derived macrophage differentiation and macrophage polarization**

- (a) In the resting macrophages, the intensity of lysoPC, lysoPS and lyoPI was found to be significantly elevated. The intensity of lysoPA was significantly decreased in M2 macrophage.
- (b) The data shown a decrease of PUFA accompanied with an increase of MUFA and the saturated species, especially the PC, PS and PA species, in human primary monocyte-macrophage differentiation.
- (c) An increase of PC, PE and PI species were found in human primary monocyte derived M1 macrophage.
- (d) When compared with M1 cells, there seemed to be an opposite tendency for M2 cells to exhibit decreases in PC, PE and PI species and increases in PG species.

### **Figure S3**

#### **The changes of lysophospholipid molecular species are observed during THP-1 derived macrophage differentiation and macrophage polarization**

- (a) Mono- and poly- unsaturated lysoPC species are significantly elevated in resting macrophages when compared with THP-1.
- (b) In the course of macrophage polarization, long-chain polyunsaturated lipids are increased in the LPS stimulation of macrophages, especially lysoPC, lysoPS and lysoPE species. It seemed to be an opposite tendency for the LPS- and IL-4-treated cells to exhibit decreases in polyunsaturated lysoPI (C18:2, C20:4) and increases in saturated lysoPI (\* $p < 0.05$ , \*\* $p < 0.01$ , \*\*\* $p < 0.001$ . \* represent comparison between M1 and M0, # represent comparison between M2 and M0, \$ represent comparison M1 and M2).

### **Figure S4**

#### **The variation of AA-containing lipid species during the courses of human monocyte-macrophage differentiation and macrophage polarization**

- (a) AA-containing glycerophospholipids were elevated in PMA-induced macrophages.
- (b) Almost all the AA-containing species we detected were increased in M1 and M2 macrophages when compared with M0 macrophages.

(\* represent comparison between M1 and M0, # represent comparison between M2 and M0, \$ represent comparison M1 and M2)  
(c) PG40:8(C20:4/20:4) is the top of lipid elevated in M1 macrophage compared with M0 and M2 cells.

### **Figure S5 The Liquid chromatographic separation conditions**

### **Figure S6 The loadings plots that correspond to the score plots that are shown in figures 2d and 4d**

(a) The loading plot is correspond to the score plot presented in figure 2d. The lipid peaks that labeled “PG/PI” in the second quadrant are responsible for separating THP-1 monocyte population. The lipid peaks that labeled “lysoPS/lysoPI/lysoPC” in the third quadrant are responsible for separating human M0 macrophage population. Similarly, the lipid peaks that labeled “PE/PS/PC/PI” and “lysoPC/lysoPE/PC” are responsible for separating human M1 and M2 macrophage population respectively.

(b) The loading plot is correspond to the score plot presented in figure 4d. The lipid peaks that labeled “;lysoPC/PI” in the second quadrant are responsible for separating mouse M0 macrophage population. The lipid peaks that labeled “PI/PG/Ceramide” are responsible for separating mouse M1 macrophage population. Similarly, the lipid peaks that labeled “lysoPS/lysoPG” in the third quadrant are responsible for separating mouse M2 macrophage population.
